# Supplementary material for: Molecular Evolution of Vertebrate Neurotrophins: Co-Option of the Highly Conserved Nerve Growth Factor Gene into the Advanced Snake Venom Arsenalf
Source: PubMed Central journal article supplement (PMC3843689; doi:10.1371/journal.pone.0081827), 2013-11-29
Supplement: pone.0081827.s001.pdf [file pone.0081827.s001.pdf]

**Table S1.1** Maximum-likelihood parameter estimates for Elapidae nerve growth factors

| Model                                     | Likelihood (t) | $\omega_0^a$ | Parameters                                                                                                                                                                              | Sign. <sup>b</sup> | No. of Sites with $\omega > 1^c$         |
|-------------------------------------------|----------------|--------------|-----------------------------------------------------------------------------------------------------------------------------------------------------------------------------------------|--------------------|------------------------------------------|
|                                           |                |              |                                                                                                                                                                                         |                    | <b>B.E.B</b>                             |
| <b>M0 (One ratio)</b>                     | -4971.215787   | 0.86         | = $\omega_0$                                                                                                                                                                            |                    | -                                        |
| <b>M1 (Neutral)</b>                       | -4872.409131   | 0.46         | P <sub>0</sub> : 0.622<br>$\omega_0$ : 0.14<br>P <sub>1</sub> : 0.377<br>$\omega_1$ : 1.0                                                                                               |                    | -                                        |
| <b>M2 (Selection)*</b>                    | -4806.688787   | 0.94         | P <sub>0</sub> : 0.544<br>$\omega_0$ : 0.19<br>P <sub>1</sub> : 0.335<br>$\omega_1$ : 1.0<br>P <sub>2</sub> : 0.119<br>$\omega_2$ : 4.23<br>P <sub>0</sub> : 0.633<br>$\omega_0$ : 0.24 | P < 0.05           | 13 (PP $\geq$ 0.99)<br>3 (P $\geq$ 0.95) |
| <b>M3 (Discrete)*</b>                     | -4806.119053   | 0.97         | P <sub>1</sub> : 0.261<br>$\omega_1$ : 1.31<br>P <sub>2</sub> : 0.104<br>$\omega_2$ : 4.56                                                                                              | P << 0.001         | -                                        |
| <b>M7 (beta)</b>                          | -4884.775245   | 0.50         | p: 0.27770<br>q: 0.27293<br>p <sub>0</sub> : 0.87<br>p: 0.538                                                                                                                           |                    | -                                        |
| <b>M8 (beta and <math>\omega</math>)*</b> | -4808.052643   | 0.95         | q: 0.574<br>p <sub>1</sub> : 0.130<br>$\omega$ : 4.09                                                                                                                                   | P < 0.05           | 14 (PP $\geq$ 0.99)<br>5 (P > 0.95)      |

**Legend:**

**a:** dn/ds (weighted average)

**b:** Significance of the model in comparison with the null model

**c:** Number of sites with  $\omega > 1$  under the Bayes empirical Bayes approach with a posterior probability (PP) more than or equal to 0.99 and 0.95

\* Models which allow  $\omega > 1$

**Table S1.2** Maximum-likelihood parameter estimates for Viperidae nerve growth factors

| Model                                     | Likelihood (l) | $\omega_0^a$ | Parameters                                                                                                                                                                                                                   | Sign. <sup>b</sup> | No. of Sites with $\omega > 1^c$          |
|-------------------------------------------|----------------|--------------|------------------------------------------------------------------------------------------------------------------------------------------------------------------------------------------------------------------------------|--------------------|-------------------------------------------|
| <b>M0 (One ratio)</b>                     | -2096.277194   | 0.72         | = $\omega_0$                                                                                                                                                                                                                 |                    | -                                         |
| <b>M1 (Neutral)</b>                       | -2088.212820   | 0.64         | $P_0$ : 0.359<br>$\omega_0$ : 0.0<br>$P_1$ : 0.640<br>$\omega_1$ : 1.0                                                                                                                                                       |                    | -                                         |
| <b>M2 (Selection)*</b>                    | -2087.182712   | 0.77         | $P_0$ : 0.361<br>$\omega_0$ : 0.0<br>$P_1$ : 0.538<br>$\omega_1$ : 1.0<br>$P_2$ : 0.099<br>$\omega_2$ : 2.39<br>$P_0$ : 0.362<br>$\omega_0$ : 0.0<br>$P_1$ : 0.542<br>$\omega_1$ : 1.0<br>$P_2$ : 0.094<br>$\omega_2$ : 2.42 | $P > 0.05^{N.S}$   | 0 (PP $\geq 0.99$ )<br>0 (P $\geq 0.95$ ) |
| <b>M3 (Discrete)*</b>                     | -2087.182664   | 0.77         | $p$ : 0.00811<br>$q$ : 0.00500<br>$p_0$ : 0.902<br>$p$ : 0.007<br>$q$ : 0.005<br>$p_1$ : 0.0976<br>$\omega$ : 2.40                                                                                                           | $P \ll 0.001$      | -                                         |
| <b>M7 (beta)</b>                          | -2088.414645   | 0.60         |                                                                                                                                                                                                                              |                    | -                                         |
| <b>M8 (beta and <math>\omega</math>)*</b> | -2087.182783   | 0.77         |                                                                                                                                                                                                                              | $P > 0.05^{N.S}$   | 0 (PP $\geq 0.99$ )<br>0 (P $\geq 0.95$ ) |

**Legend:**

**a:** dn/ds (weighted average)

**b:** Significance of the model in comparison with the null model

**c:** Number of sites with  $\omega > 1$  under the Bayes empirical Bayes approach with a posterior probability (PP) more than or equal to 0.99 and 0.95

\* Models which allow  $\omega > 1$

$P > 0.05^{N.S}$ : Not significant at 0.05

**Table S1.3** Maximum-likelihood parameter estimates for ‘non-front-fanged’ advanced snake nerve growth factors

| Model                                     | Likelihood (l) | $\omega_0^a$ | Parameters                                                                                                                                         | Sign. <sup>b</sup> | No. of Sites with $\omega > 1^c$        |
|-------------------------------------------|----------------|--------------|----------------------------------------------------------------------------------------------------------------------------------------------------|--------------------|-----------------------------------------|
|                                           |                |              |                                                                                                                                                    |                    | <b>B.E.B</b>                            |
| <b>M0 (One ratio)</b>                     | -1627.071386   | 0.54         | = $\omega_0$                                                                                                                                       |                    | -                                       |
| <b>M1 (Neutral)</b>                       | -1618.386483   | 0.51         | $P_0$ : 0.487<br>$\omega_0$ : 0.0<br>$P_1$ : 0.512<br>$\omega_1$ : 1.0                                                                             |                    | -                                       |
| <b>M2 (Selection)*</b>                    | -1617.549643   | 0.58         | $P_0$ : 0.561<br>$\omega_0$ : 0.07<br>$P_1$ : 0.373<br>$\omega_1$ : 1.0<br>$P_2$ : 0.065<br>$\omega_2$ : 2.63<br>$P_0$ : 0.419<br>$\omega_0$ : 0.0 | $P \ll 0.001$      | 0 (PP $\geq$ 0.99)<br>0 (P $\geq$ 0.95) |
| <b>M3 (Discrete)*</b>                     | -1617.506927   | 0.58         | $P_1$ : 0.481<br>$\omega_1$ : 0.71<br>$P_2$ : 0.099<br>$\omega_2$ : 2.41                                                                           | $P \ll 0.001$      | -                                       |
| <b>M7 (beta)</b>                          | -1618.399985   | 0.50         | p: 0.01595<br>q: 0.01445<br>$p_0$ : 0.917<br>p: 0.179                                                                                              |                    | -                                       |
| <b>M8 (beta and <math>\omega</math>)*</b> | -1617.527922   | 0.58         | q: 0.253<br>$p_1$ : 0.082<br>$\omega$ : 2.50                                                                                                       | $P \ll 0.001$      | 0 (PP $\geq$ 0.99)<br>0 (P $>$ 0.95)    |

**Legend:**

**a:** dn/ds (weighted average)

**b:** Significance of the model in comparison with the null model

**c:** Number of sites with  $\omega > 1$  under the Bayes empirical Bayes approach with a posterior probability (PP) more than or equal to 0.99 and 0.95

\* Models which allow  $\omega > 1$

**Table S1.4** Maximum-likelihood parameter estimates for Henophidia nerve growth factors

| Model                                     | Likelihood (t) | $\omega_0^a$ | Parameters                                                                                                                                         | Sign. <sup>b</sup> | No. of Sites with $\omega > 1^c$   |
|-------------------------------------------|----------------|--------------|----------------------------------------------------------------------------------------------------------------------------------------------------|--------------------|------------------------------------|
|                                           |                |              |                                                                                                                                                    |                    | <b>B.E.B</b>                       |
| <b>M0 (One ratio)</b>                     | -1515.110043   | 0.28         | = $\omega_0$                                                                                                                                       |                    | -                                  |
| <b>M1 (Neutral)</b>                       | -1504.271757   | 0.29         | $P_0$ : 0.726<br>$\omega_0$ : 0.02<br>$P_1$ : 0.273<br>$\omega_1$ : 1.0                                                                            |                    | -                                  |
| <b>M2 (Selection)*</b>                    | -1504.231832   | 0.30         | $P_0$ : 0.767<br>$\omega_0$ : 0.0<br>$P_1$ : 0.370<br>$\omega_1$ : 1.0<br>$P_2$ : 0.232<br>$\omega_2$ : 1.13<br>$P_0$ : 0.512<br>$\omega_0$ : 0.04 | P << 0.001         | 0 (PP $\geq$ 0.99)<br>0 (P > 0.95) |
| <b>M3 (Discrete)*</b>                     | -1504.231832   | 0.30         | $P_1$ : 0.254<br>$\omega_1$ : 0.04<br>$P_2$ : 0.232<br>$\omega_2$ : 1.13                                                                           | P << 0.001         | -                                  |
| <b>M7 (beta)</b>                          | -1504.332117   | 0.30         | p: 0.03702<br>q: 0.08621<br>p <sub>0</sub> : 0.767<br>p: 5.124                                                                                     |                    | -                                  |
| <b>M8 (beta and <math>\omega</math>)*</b> | -1504.235244   | 0.30         | q: 99.0<br>p <sub>1</sub> : 0.232<br>$\omega$ : 1.13                                                                                               | P << 0.001         | 0 (PP $\geq$ 0.99)<br>0 (P > 0.95) |

**Legend:**

**a:** dn/ds (weighted average)

**b:** Significance of the model in comparison with the null model

**c:** Number of sites with  $\omega > 1$  under the Bayes empirical Bayes approach with a posterior probability (PP) more than or equal to 0.99 and 0.95

\* Models which allow  $\omega > 1$

**Table S1.5** Maximum-likelihood parameter estimates for Iguania nerve growth factors

| Model                    | Likelihood (l) | $\omega_0^a$ | Parameters                                                                                                                                                                                                                                                                           | Sign. <sup>b</sup> | No. of Sites with $\omega > 1^c$   | B.E.B |
|--------------------------|----------------|--------------|--------------------------------------------------------------------------------------------------------------------------------------------------------------------------------------------------------------------------------------------------------------------------------------|--------------------|------------------------------------|-------|
| M0 (One ratio)           | -3790.346051   | 0.24         | = $\omega_0$                                                                                                                                                                                                                                                                         |                    |                                    | -     |
| M1 (Neutral)             | -3702.296471   | 0.29         | P <sub>0</sub> : 0.750<br>$\omega_0$ : 0.05<br>P <sub>1</sub> : 0.249<br>$\omega_1$ : 1.0                                                                                                                                                                                            |                    |                                    | -     |
| M2 (Selection)*          | -3702.296471   | 0.29         | P <sub>0</sub> : 0.750<br>$\omega_0$ : 0.05<br>P <sub>1</sub> : 0.162<br>$\omega_1$ : 1.0<br>P <sub>2</sub> : 0.086<br>$\omega_2$ : 1.0<br>P <sub>0</sub> : 0.431<br>$\omega_0$ : 0.05<br>P <sub>1</sub> : 0.301<br>$\omega_1$ : 0.05<br>P <sub>2</sub> : 0.266<br>$\omega_2$ : 0.83 | P << 0.001         | 0 (PP $\geq$ 0.99)<br>0 (P > 0.95) |       |
| M3 (Discrete)*           | -3700.970435   | 0.25         | p: 0.19627<br>q: 0.57899<br>p <sub>0</sub> : 0.996<br>p: 0.201<br>q: 0.607<br>p <sub>1</sub> : 0.003<br>$\omega$ : 2.77                                                                                                                                                              | P << 0.001         |                                    | -     |
| M7 (beta)                | -3705.105730   | 0.25         |                                                                                                                                                                                                                                                                                      |                    |                                    | -     |
| M8 (beta and $\omega$ )* | -3704.801826   | 0.25         |                                                                                                                                                                                                                                                                                      | P << 0.001         | 0 (PP $\geq$ 0.99)<br>0 (P > 0.95) |       |

**Legend:**

**a:** dn/ds (weighted average)

**b:** Significance of the model in comparison with the null model

**c:** Number of sites with  $\omega > 1$  under the Bayes empirical Bayes approach with a posterior probability (PP) more than or equal to 0.99 and 0.95

\* Models which allow  $\omega > 1$

**Table S1.6** Maximum-likelihood parameter estimates for Anguimorpha nerve growth factors

| Model                                     | Likelihood (l) | $\omega_0^a$ | Parameters                                                                                                                                        | Sign. <sup>b</sup> | No. of Sites with $\omega > 1^c$         |
|-------------------------------------------|----------------|--------------|---------------------------------------------------------------------------------------------------------------------------------------------------|--------------------|------------------------------------------|
| <b>M0 (One ratio)</b>                     | -1825.008075   | 0.31         | = $\omega_0$                                                                                                                                      |                    | -                                        |
| <b>M1 (Neutral)</b>                       | -1817.374921   | 0.36         | $P_0$ : 0.684<br>$\omega_0$ : 0.075<br>$P_1$ : 0.315<br>$\omega_1$ : 1.0                                                                          |                    | -                                        |
| <b>M2 (Selection)*</b>                    | -1817.374921   | 0.36         | $P_0$ : 0.684<br>$\omega_0$ : 0.07<br>$P_1$ : 0.232<br>$\omega_1$ : 1.0<br>$P_2$ : 0.082<br>$\omega_2$ : 1.0<br>$P_0$ : 0.506<br>$\omega_0$ : 0.0 | $P \ll 0.001$      | 0 ( $PP \geq 0.99$ )<br>0 ( $P > 0.95$ ) |
| <b>M3 (Discrete)*</b>                     | -1815.825499   | 0.31         | $P_1$ : 0.252<br>$\omega_1$ : 0.64<br>$P_2$ : 0.240<br>$\omega_2$ : 0.64                                                                          | $P \ll 0.001$      | -                                        |
| <b>M7 (beta)</b>                          | -1816.464744   | 0.33         | $p$ : 0.21976<br>$q$ : 0.44133<br>$p_0$ : 0.999                                                                                                   |                    | -                                        |
| <b>M8 (beta and <math>\omega</math>)*</b> | -1816.464750   | 0.33         | $p$ : 0.219<br>$q$ : 0.441<br>$p_1$ : 0.00001<br>$\omega$ : 1.0                                                                                   | $P \ll 0.001$      | 0 ( $PP \geq 0.99$ )<br>0 ( $P > 0.95$ ) |

**Legend:**

**a:**  $dn/ds$  (weighted average)

**b:** Significance of the model in comparison with the null model

**c:** Number of sites with  $\omega > 1$  under the Bayes empirical Bayes approach with a posterior probability (PP) more than or equal to 0.99 and 0.95

\* Models which allow  $\omega > 1$

**Table S1.7** Maximum-likelihood parameter estimates for Gekkota nerve growth factors

| Model                                     | Likelihood (t) | $\omega_0^a$ | Parameters                                                                                                     | Sign. <sup>b</sup> | No. of Sites with $\omega > 1^c$   |
|-------------------------------------------|----------------|--------------|----------------------------------------------------------------------------------------------------------------|--------------------|------------------------------------|
| <b>M0 (One ratio)</b>                     | -1612.059249   | 0.23         | = $\omega_0$                                                                                                   |                    | -                                  |
| <b>M1 (Neutral)</b>                       | -1598.686340   | 0.22         | $P_0$ : 0.838<br>$\omega_0$ : 0.08<br>$P_1$ : 0.161<br>$\omega_1$ : 1.0                                        |                    | -                                  |
| <b>M2 (Selection)*</b>                    | -1597.762199   | 0.25         | $P_0$ : 0.858<br>$\omega_0$ : 0.095<br>$P_1$ : 0.128<br>$\omega_1$ : 1.0<br>$P_2$ : 0.013<br>$\omega_2$ : 3.70 | P << 0.001         | 0 (PP $\geq$ 0.99)<br>0 (P > 0.95) |
| <b>M3 (Discrete)*</b>                     | -1597.734005   | 0.25         | $P_0$ : 0.811<br>$\omega_0$ : 0.07<br>$P_1$ : 0.172<br>$\omega_1$ : 0.78<br>$P_2$ : 0.015<br>$\omega_2$ : 3.56 | P << 0.001         | -                                  |
| <b>M7 (beta)</b>                          | -1599.515007   | 0.23         | p: 0.15007<br>q: 0.48881<br>p <sub>0</sub> : 0.980<br>p: 0.311                                                 |                    | -                                  |
| <b>M8 (beta and <math>\omega</math>)*</b> | -1597.805828   | 0.25         | q: 1.25<br>p <sub>1</sub> : 0.019<br>$\omega$ : 3.33                                                           | P << 0.001         | 0 (PP $\geq$ 0.99)<br>0 (P > 0.95) |

**Legend:**

**a:** dn/ds (weighted average)

**b:** Significance of the model in comparison with the null model

**c:** Number of sites with  $\omega > 1$  under the Bayes empirical Bayes approach with a posterior probability (PP) more than or equal to 0.99 and 0.95

\* Models which allow  $\omega > 1$

**Table S1.8** Maximum-likelihood parameter estimates for Scinciformata nerve growth factors

| Model                                     | Likelihood (t) | $\omega_0^a$ | Parameters                                                                                                                                                                             | Sign. <sup>b</sup> | No. of Sites with $\omega > 1^c$   |
|-------------------------------------------|----------------|--------------|----------------------------------------------------------------------------------------------------------------------------------------------------------------------------------------|--------------------|------------------------------------|
| <b>M0 (One ratio)</b>                     | -1704.723234   | 0.20         | = $\omega_0$                                                                                                                                                                           |                    | -                                  |
| <b>M1 (Neutral)</b>                       | -1701.003298   | 0.25         | P <sub>0</sub> : 0.818<br>$\omega_0$ : 0.09<br>P <sub>1</sub> : 0.181<br>$\omega_1$ : 1.0                                                                                              |                    | -                                  |
| <b>M2 (Selection)*</b>                    | -1701.003298   | 0.25         | P <sub>0</sub> : 0.531<br>$\omega_0$ : 0.0<br>P <sub>1</sub> : 0.241<br>$\omega_1$ : 0.46<br>P <sub>2</sub> : 0.227<br>$\omega_2$ : 0.46<br>P <sub>0</sub> : 0.343<br>$\omega_0$ : 0.0 | P << 0.001         | 0 (PP $\geq$ 0.99)<br>0 (P > 0.95) |
| <b>M3 (Discrete)*</b>                     | -1697.979157   | 0.21         | P <sub>1</sub> : 0.592<br>$\omega_1$ : 2.93<br>P <sub>2</sub> : 0.064<br>$\omega_2$ : 13.44                                                                                            | P << 0.001         | -                                  |
| <b>M7 (beta)</b>                          | -1698.961126   | 0.22         | p: 0.34022<br>q: 1.17860<br>p <sub>0</sub> : 0.999<br>p: 0.340                                                                                                                         |                    | -                                  |
| <b>M8 (beta and <math>\omega</math>)*</b> | -1698.961169   | 0.22         | q: 1.178<br>p <sub>1</sub> : 0.00001<br>$\omega$ : 1.0                                                                                                                                 | P << 0.001         | 0 (PP $\geq$ 0.99)<br>0 (P > 0.95) |

**Legend:**

**a:** dn/ds (weighted average)

**b:** Significance of the model in comparison with the null model

**c:** Number of sites with  $\omega > 1$  under the Bayes empirical Bayes approach with a posterior probability (PP) more than or equal to 0.99 and 0.95

\* Models which allow  $\omega > 1$



**Table S1.9** Maximum-likelihood parameter estimates for Laterata nerve growth factors

| Model                                     | Likelihood (t) | $\omega_0^a$ | Parameters                                                                                                     | Sign. <sup>b</sup> | No. of Sites with $\omega > 1^c$   |
|-------------------------------------------|----------------|--------------|----------------------------------------------------------------------------------------------------------------|--------------------|------------------------------------|
| <b>M0 (One ratio)</b>                     | -1687.358175   | 0.24         | = $\omega_0$                                                                                                   |                    | -                                  |
| <b>M1 (Neutral)</b>                       | -1671.898713   | 0.27         | $P_0$ : 0.766<br>$\omega_0$ : 0.05<br>$P_1$ : 0.233<br>$\omega_1$ : 1.0                                        |                    | -                                  |
| <b>M2 (Selection)*</b>                    | -1671.898713   | 0.27         | $P_0$ : 0.766<br>$\omega_0$ : 0.05<br>$P_1$ : 0.166<br>$\omega_1$ : 1.0<br>$P_2$ : 0.067<br>$\omega_2$ : 1.0   | P << 0.001         | 0 (PP $\geq$ 0.99)<br>0 (P > 0.95) |
| <b>M3 (Discrete)*</b>                     | -1671.696617   | 0.26         | $P_0$ : 0.167<br>$\omega_0$ : 0.03<br>$P_1$ : 0.538<br>$\omega_1$ : 0.03<br>$P_2$ : 0.294<br>$\omega_2$ : 0.80 | P << 0.001         | -                                  |
| <b>M7 (beta)</b>                          | -1671.866588   | 0.26         | p: 0.13468<br>q: 0.37099<br>p <sub>0</sub> : 0.999                                                             |                    | -                                  |
| <b>M8 (beta and <math>\omega</math>)*</b> | -1671.866589   | 0.26         | p: 0.134<br>q: 0.371<br>p <sub>1</sub> : 0.00001<br>$\omega$ : 1.0                                             | P << 0.001         | 0 (PP $\geq$ 0.99)<br>0 (P > 0.95) |

**Legend:**

**a:** dn/ds (weighted average)

**b:** Significance of the model in comparison with the null model

**c:** Number of sites with  $\omega > 1$  under the Bayes empirical Bayes approach with a posterior probability (PP) more than or equal to 0.99 and 0.95

\* Models which allow  $\omega > 1$

**Table S1.10** Maximum-likelihood parameter estimates for turtle nerve growth factors

| Model                                     | Likelihood (l) | $\omega_0^a$ | Parameters                                                                                                                                                                            | Sign. <sup>b</sup> | No. of Sites with $\omega > 1^c$   | B.E.B |
|-------------------------------------------|----------------|--------------|---------------------------------------------------------------------------------------------------------------------------------------------------------------------------------------|--------------------|------------------------------------|-------|
| <b>M0 (One ratio)</b>                     | -1348.106425   | 0.30         | = $\omega_0$                                                                                                                                                                          |                    |                                    | -     |
| <b>M1 (Neutral)</b>                       | -1340.646247   | 0.34         | P <sub>0</sub> : 0.734<br>$\omega_0$ : 0.11<br>P <sub>1</sub> : 0.265<br>$\omega_1$ : 1.0                                                                                             |                    |                                    | -     |
| <b>M2 (Selection)*</b>                    | -1340.646217   | 0.34         | P <sub>0</sub> : 0.734<br>$\omega_0$ : 0.11<br>P <sub>1</sub> : 0.183<br>$\omega_1$ : 1.0<br>P <sub>2</sub> : 0.081<br>$\omega_2$ : 1.0<br>P <sub>0</sub> : 0.365<br>$\omega_0$ : 0.0 | P << 0.001         | 0 (PP $\geq$ 0.99)<br>0 (P > 0.95) |       |
| <b>M3 (Discrete)*</b>                     | -1340.152735   | 0.31         | P <sub>1</sub> : 0.323<br>$\omega_1$ : 0.24<br>P <sub>2</sub> : 0.310<br>$\omega_2$ : 0.77                                                                                            | P << 0.001         |                                    | -     |
| <b>M7 (beta)</b>                          | -1340.175892   | 0.32         | p: 0.31471<br>q: 0.66249<br>p <sub>0</sub> : 1.0                                                                                                                                      |                    |                                    | -     |
| <b>M8 (beta and <math>\omega</math>)*</b> | -1340.175892   | 0.32         | p: 0.314<br>q: 0.662<br>p <sub>1</sub> : 0.0<br>$\omega$ : 1.0                                                                                                                        | P << 0.001         | 0 (PP $\geq$ 0.99)<br>0 (P > 0.95) |       |

**Legend:**

**a:** dn/ds (weighted average)

**b:** Significance of the model in comparison with the null model

**c:** Number of sites with  $\omega > 1$  under the Bayes empirical Bayes approach with a posterior probability (PP) more than or equal to 0.99 and 0.95

\* Models which allow  $\omega > 1$

**Table S1.11** Maximum-likelihood parameter estimates for mammalian nerve growth factors

| Model                                     | Likelihood (l) | $\omega_0^a$ | Parameters                                                                                                                                   | Sign. <sup>b</sup> | No. of Sites with $\omega > 1^c$   |
|-------------------------------------------|----------------|--------------|----------------------------------------------------------------------------------------------------------------------------------------------|--------------------|------------------------------------|
|                                           |                |              |                                                                                                                                              |                    | <b>B.E.B</b>                       |
| <b>M0 (One ratio)</b>                     | -2588.712520   | 0.09         | = $\omega_0$                                                                                                                                 |                    | -                                  |
| <b>M1 (Neutral)</b>                       | -2575.113733   | 0.17         | P <sub>0</sub> : 0.863<br>$\omega_0$ : 0.04<br>P <sub>1</sub> : 0.136<br>$\omega_1$ : 1.0                                                    |                    | -                                  |
| <b>M2 (Selection)*</b>                    | -2575.113733   | 0.17         | P <sub>0</sub> : 0.863<br>$\omega_0$ : 0.04<br>P <sub>1</sub> : 0.070<br>$\omega_1$ : 1.0<br>P <sub>2</sub> : 0.065<br>$\omega_2$ : 1.0      | P << 0.001         | 0 (PP $\geq$ 0.99)<br>0 (P > 0.95) |
| <b>M3 (Discrete)*</b>                     | -2552.967953   | 0.11         | P <sub>0</sub> : 0.475<br>$\omega_0$ : 0.007<br>P <sub>1</sub> : 0.392<br>$\omega_1$ : 0.116<br>P <sub>2</sub> : 0.132<br>$\omega_2$ : 0.491 | P << 0.001         | -                                  |
| <b>M7 (beta)</b>                          | -2553.020726   | 0.11         | p: 0.36046<br>q: 2.71196<br>p <sub>0</sub> : 1.0                                                                                             |                    | -                                  |
| <b>M8 (beta and <math>\omega</math>)*</b> | -2553.020729   | 0.11         | p: 0.360<br>q: 2.71<br>p <sub>1</sub> : 0.0<br>$\omega$ : 1.0                                                                                | P << 0.001         | 0 (PP $\geq$ 0.99)<br>0 (P > 0.95) |

**Legend:**

**a:** dn/ds (weighted average)

**b:** Significance of the model in comparison with the null model

**c:** Number of sites with  $\omega > 1$  under the Bayes empirical Bayes approach with a posterior probability (PP) more than or equal to 0.99 and 0.95

\* Models which allow  $\omega > 1$
