# Supplementary material for: Molecular Evolution of Vertebrate Neurotrophins: Co-Option of the Highly Conserved Nerve Growth Factor Gene into the Advanced Snake Venom Arsenalf
Source: PubMed Central journal article supplement (PMC3843689; doi:10.1371/journal.pone.0081827), 2013-11-29
Supplement: pone.0081827.s003.pdf [file pone.0081827.s003.pdf]

**Table S3.1** Maximum-likelihood parameter estimates for Elapidae neurotrophin-3

| Model                                     | Likelihood (t) | $\omega_0^a$ | Parameters                                                                                                                                         | Sign. <sup>b</sup> | No. of Sites with $\omega > 1^c$        |
|-------------------------------------------|----------------|--------------|----------------------------------------------------------------------------------------------------------------------------------------------------|--------------------|-----------------------------------------|
|                                           |                |              |                                                                                                                                                    |                    | <b>B.E.B</b>                            |
| <b>M0 (One ratio)</b>                     | -694.206382    | 0.49         | = $\omega_0$                                                                                                                                       |                    | -                                       |
| <b>M1 (Neutral)</b>                       | -673.832213    | 0.43         | $P_0$ : 0.578<br>$\omega_0$ : 0.02<br>$P_1$ : 0.421<br>$\omega_1$ : 1.0                                                                            |                    | -                                       |
| <b>M2 (Selection)*</b>                    | -669.684563    | 0.92         | $P_0$ : 0.511<br>$\omega_0$ : 0.02<br>$P_1$ : 0.366<br>$\omega_1$ : 1.0<br>$P_2$ : 0.121<br>$\omega_2$ : 4.59<br>$P_0$ : 0.471<br>$\omega_0$ : 0.0 | P < 0.05           | 0 (PP $\geq$ 0.99)<br>1 (P $\geq$ 0.95) |
| <b>M3 (Discrete)*</b>                     | -669.242390    | 0.79         | $P_1$ : 0.391<br>$\omega_1$ : 0.67<br>$P_2$ : 0.137<br>$\omega_2$ : 3.84                                                                           | P << 0.001         | -                                       |
| <b>M7 (beta)</b>                          | -673.779182    | 0.42         | p: 0.02013<br>q: 0.02583<br>p <sub>0</sub> : 0.873<br>p: 0.082                                                                                     |                    | -                                       |
| <b>M8 (beta and <math>\omega</math>)*</b> | -669.558752    | 0.84         | q: 0.143<br>p <sub>1</sub> : 0.126<br>$\omega$ : 4.18                                                                                              | P < 0.05           | 1 (PP $\geq$ 0.99)<br>3 (P > 0.95)      |

**Legend:****a:** dn/ds (weighted average)**b:** Significance of the model in comparison with the null model**c:** Number of sites with  $\omega > 1$  under the Bayes empirical Bayes approach with a posterior probability (PP) more than or equal to 0.99 and 0.95\* Models which allow  $\omega > 1$

**Table S3.2** Maximum-likelihood parameter estimates for Viperidae neurotrophin-3

| Model                                     | Likelihood (l) | $\omega_0^a$ | Parameters                                                                                                                                         | Sign. <sup>b</sup> | No. of Sites with $\omega > 1^c$        |
|-------------------------------------------|----------------|--------------|----------------------------------------------------------------------------------------------------------------------------------------------------|--------------------|-----------------------------------------|
| <b>M0 (One ratio)</b>                     | -787.105320    | 0.31         | = $\omega_0$                                                                                                                                       |                    | -                                       |
| <b>M1 (Neutral)</b>                       | -768.396299    | 0.71         | $P_0$ : 0.289<br>$\omega_0$ : 0.001<br>$P_1$ : 0.710<br>$\omega_1$ : 1.0                                                                           |                    | -                                       |
| <b>M2 (Selection)*</b>                    | -768.396299    | 0.71         | $P_0$ : 0.289<br>$\omega_0$ : 0.001<br>$P_1$ : 0.499<br>$\omega_1$ : 1.0<br>$P_2$ : 0.210<br>$\omega_2$ : 1.0<br>$P_0$ : 0.250<br>$\omega_0$ : 0.0 | $P > 0.05^{N.S}$   | 0 (PP $\geq$ 0.99)<br>0 (P $\geq$ 0.95) |
| <b>M3 (Discrete)*</b>                     | -761.777562    | 0.41         | $P_1$ : 0.264<br>$\omega_1$ : 0.10<br>$P_2$ : 0.484<br>$\omega_2$ : 0.80                                                                           | $P \ll 0.001$      | -                                       |
| <b>M7 (beta)</b>                          | -763.149655    | 0.44         | p: 0.18348<br>q: 0.22677<br>p <sub>0</sub> : 0.999                                                                                                 |                    | -                                       |
| <b>M8 (beta and <math>\omega</math>)*</b> | -763.149658    | 0.44         | p: 0.183<br>q: 0.226<br>p <sub>1</sub> : 0.00001<br>$\omega$ : 1.0                                                                                 | $P > 0.05^{N.S}$   | 0 (PP $\geq$ 0.99)<br>0 (P $>$ 0.95)    |

**Legend:**

**a:** dn/ds (weighted average)

**b:** Significance of the model in comparison with the null model

**c:** Number of sites with  $\omega > 1$  under the Bayes empirical Bayes approach with a posterior probability (PP) more than or equal to 0.99 and 0.95

\* Models which allow  $\omega > 1$

$P > 0.05^{N.S}$ : Not significant at 0.05

**Table S3.3** Maximum-likelihood parameter estimates for ‘non-front-fanged’ advanced snake neurotrophin-3

| Model                                     | Likelihood (l) | $\omega_0^a$ | Parameters                                                                                                                                                                            | Sign. <sup>b</sup> | No. of Sites with $\omega > 1^c$        |
|-------------------------------------------|----------------|--------------|---------------------------------------------------------------------------------------------------------------------------------------------------------------------------------------|--------------------|-----------------------------------------|
|                                           |                |              |                                                                                                                                                                                       |                    | <b>B.E.B</b>                            |
| <b>M0 (One ratio)</b>                     | -744.714302    | 1.88         | = $\omega_0$                                                                                                                                                                          |                    | -                                       |
| <b>M1 (Neutral)</b>                       | -741.684732    | 0.70         | P <sub>0</sub> : 0.292<br>$\omega_0$ : 0.0<br>P <sub>1</sub> : 0.707<br>$\omega_1$ : 1.0                                                                                              |                    | -                                       |
| <b>M2 (Selection)*</b>                    | -731.444226    | 2.24         | P <sub>0</sub> : 0.239<br>$\omega_0$ : 0.0<br>P <sub>1</sub> : 0.370<br>$\omega_1$ : 1.0<br>P <sub>2</sub> : 0.390<br>$\omega_2$ : 4.78<br>P <sub>0</sub> : 0.343<br>$\omega_0$ : 0.0 | P << 0.001         | 3 (PP $\geq$ 0.99)<br>2 (P $\geq$ 0.95) |
| <b>M3 (Discrete)*</b>                     | -729.662821    | 2.60         | P <sub>1</sub> : 0.592<br>$\omega_1$ : 2.93<br>P <sub>2</sub> : 0.064<br>$\omega_2$ : 13.44                                                                                           | P << 0.001         | -                                       |
| <b>M7 (beta)</b>                          | -741.689003    | 0.70         | p: 0.01169<br>q: 0.00500<br>p <sub>0</sub> : 0.561<br>p: 0.005                                                                                                                        |                    | -                                       |
| <b>M8 (beta and <math>\omega</math>)*</b> | -731.500666    | 2.25         | q: 0.005<br>p <sub>1</sub> : 0.438<br>$\omega$ : 4.51                                                                                                                                 | P << 0.001         | 4 (PP $\geq$ 0.99)<br>5 (P > 0.95)      |

**Legend:**

**a:** dn/ds (weighted average)

**b:** Significance of the model in comparison with the null model

**c:** Number of sites with  $\omega > 1$  under the Bayes empirical Bayes approach with a posterior probability (PP) more than or equal to 0.99 and 0.95

\* Models which allow  $\omega > 1$

**Table S3.4** Maximum-likelihood parameter estimates for Typhlopoidea neurotrophin-3

| Model                                     | Likelihood (l) | $\omega_0^a$ | Parameters                                                                                                                                                                            | Sign. <sup>b</sup> | No. of Sites with $\omega > 1^c$        |
|-------------------------------------------|----------------|--------------|---------------------------------------------------------------------------------------------------------------------------------------------------------------------------------------|--------------------|-----------------------------------------|
|                                           |                |              |                                                                                                                                                                                       |                    | <b>B.E.B</b>                            |
| <b>M0 (One ratio)</b>                     | -744.714302    | 1.88         | = $\omega_0$                                                                                                                                                                          |                    | -                                       |
| <b>M1 (Neutral)</b>                       | -741.684732    | 0.70         | P <sub>0</sub> : 0.292<br>$\omega_0$ : 0.0<br>P <sub>1</sub> : 0.707<br>$\omega_1$ : 1.0                                                                                              |                    | -                                       |
| <b>M2 (Selection)*</b>                    | -731.444226    | 2.24         | P <sub>0</sub> : 0.239<br>$\omega_0$ : 0.0<br>P <sub>1</sub> : 0.370<br>$\omega_1$ : 1.0<br>P <sub>2</sub> : 0.390<br>$\omega_2$ : 4.78<br>P <sub>0</sub> : 0.343<br>$\omega_0$ : 0.0 | P << 0.001         | 3 (PP $\geq$ 0.99)<br>2 (P $\geq$ 0.95) |
| <b>M3 (Discrete)*</b>                     | -729.662821    | 2.60         | P <sub>1</sub> : 0.592<br>$\omega_1$ : 2.93<br>P <sub>2</sub> : 0.064<br>$\omega_2$ : 13.44                                                                                           | P << 0.001         | -                                       |
| <b>M7 (beta)</b>                          | -741.689003    | 0.70         | p: 0.01169<br>q: 0.00500<br>p <sub>0</sub> : 0.561<br>p: 0.005                                                                                                                        |                    | -                                       |
| <b>M8 (beta and <math>\omega</math>)*</b> | -731.500666    | 2.25         | q: 0.005<br>p <sub>1</sub> : 0.438<br>$\omega$ : 4.51                                                                                                                                 | P << 0.001         | 4 (PP $\geq$ 0.99)<br>5 (P > 0.95)      |

**Legend:**

**a:** dn/ds (weighted average)

**b:** Significance of the model in comparison with the null model

**c:** Number of sites with  $\omega > 1$  under the Bayes empirical Bayes approach with a posterior probability (PP) more than or equal to 0.99 and 0.95

\* Models which allow  $\omega > 1$

**Table S3.5** Maximum-likelihood parameter estimates for Boidae (Henophidia) neurotrophin-3

| Model                                     | Likelihood (l) | $\omega_0^a$ | Parameters                                                                                                                                                                            | Sign. <sup>b</sup> | No. of Sites with $\omega > 1^c$        | B.E.B |
|-------------------------------------------|----------------|--------------|---------------------------------------------------------------------------------------------------------------------------------------------------------------------------------------|--------------------|-----------------------------------------|-------|
| <b>M0 (One ratio)</b>                     | -744.714302    | 1.88         | = $\omega_0$                                                                                                                                                                          |                    |                                         | -     |
| <b>M1 (Neutral)</b>                       | -741.684732    | 0.70         | P <sub>0</sub> : 0.292<br>$\omega_0$ : 0.0<br>P <sub>1</sub> : 0.707<br>$\omega_1$ : 1.0                                                                                              |                    |                                         | -     |
| <b>M2 (Selection)*</b>                    | -731.444226    | 2.24         | P <sub>0</sub> : 0.239<br>$\omega_0$ : 0.0<br>P <sub>1</sub> : 0.370<br>$\omega_1$ : 1.0<br>P <sub>2</sub> : 0.390<br>$\omega_2$ : 4.78<br>P <sub>0</sub> : 0.343<br>$\omega_0$ : 0.0 | P << 0.001         | 3 (PP $\geq$ 0.99)<br>2 (P $\geq$ 0.95) |       |
| <b>M3 (Discrete)*</b>                     | -729.662821    | 2.60         | P <sub>1</sub> : 0.592<br>$\omega_1$ : 2.93<br>P <sub>2</sub> : 0.064<br>$\omega_2$ : 13.44                                                                                           | P << 0.001         |                                         | -     |
| <b>M7 (beta)</b>                          | -741.689003    | 0.70         | p: 0.01169<br>q: 0.00500<br>p <sub>0</sub> : 0.561<br>p: 0.005                                                                                                                        |                    |                                         | -     |
| <b>M8 (beta and <math>\omega</math>)*</b> | -731.500666    | 2.25         | q: 0.005<br>p <sub>1</sub> : 0.438<br>$\omega$ : 4.51                                                                                                                                 | P << 0.001         | 4 (PP $\geq$ 0.99)<br>5 (P > 0.95)      |       |

**Legend:**

**a:** dn/ds (weighted average)

**b:** Significance of the model in comparison with the null model

**c:** Number of sites with  $\omega > 1$  under the Bayes empirical Bayes approach with a posterior probability (PP) more than or equal to 0.99 and 0.95

\* Models which allow  $\omega > 1$

**Table S3.6** Maximum-likelihood parameter estimates for Scinciformata neurotrophin-3

| Model                    | Likelihood (l) | $\omega_0^a$ | Parameters                                                                                                                                                                            | Sign. <sup>b</sup> | No. of Sites with $\omega > 1^c$        | B.E.B |
|--------------------------|----------------|--------------|---------------------------------------------------------------------------------------------------------------------------------------------------------------------------------------|--------------------|-----------------------------------------|-------|
| M0 (One ratio)           | -744.714302    | 1.88         | = $\omega_0$                                                                                                                                                                          |                    |                                         | -     |
| M1 (Neutral)             | -741.684732    | 0.70         | P <sub>0</sub> : 0.292<br>$\omega_0$ : 0.0<br>P <sub>1</sub> : 0.707<br>$\omega_1$ : 1.0                                                                                              |                    |                                         | -     |
| M2 (Selection)*          | -731.444226    | 2.24         | P <sub>0</sub> : 0.239<br>$\omega_0$ : 0.0<br>P <sub>1</sub> : 0.370<br>$\omega_1$ : 1.0<br>P <sub>2</sub> : 0.390<br>$\omega_2$ : 4.78<br>P <sub>0</sub> : 0.343<br>$\omega_0$ : 0.0 | P << 0.001         | 3 (PP $\geq$ 0.99)<br>2 (P $\geq$ 0.95) |       |
| M3 (Discrete)*           | -729.662821    | 2.60         | P <sub>1</sub> : 0.592<br>$\omega_1$ : 2.93<br>P <sub>2</sub> : 0.064<br>$\omega_2$ : 13.44                                                                                           | P << 0.001         |                                         | -     |
| M7 (beta)                | -741.689003    | 0.70         | p: 0.01169<br>q: 0.00500<br>p <sub>0</sub> : 0.561<br>p: 0.005                                                                                                                        |                    |                                         | -     |
| M8 (beta and $\omega$ )* | -731.500666    | 2.25         | q: 0.005<br>p <sub>1</sub> : 0.438<br>$\omega$ : 4.51                                                                                                                                 | P << 0.001         | 4 (PP $\geq$ 0.99)<br>5 (P > 0.95)      |       |

**Legend:**

**a:** dn/ds (weighted average)

**b:** Significance of the model in comparison with the null model

**c:** Number of sites with  $\omega > 1$  under the Bayes empirical Bayes approach with a posterior probability (PP) more than or equal to 0.99 and 0.95

\* Models which allow  $\omega > 1$

**Table S3.7** Maximum-likelihood parameter estimates for Iguania neurotrophin-3

| Model                                     | Likelihood (l) | $\omega_0^a$ | Parameters                                                                                                                                                                            | Sign. <sup>b</sup> | No. of Sites with $\omega > 1^c$        |
|-------------------------------------------|----------------|--------------|---------------------------------------------------------------------------------------------------------------------------------------------------------------------------------------|--------------------|-----------------------------------------|
| <b>M0 (One ratio)</b>                     | -744.714302    | 1.88         | = $\omega_0$                                                                                                                                                                          |                    | -                                       |
| <b>M1 (Neutral)</b>                       | -741.684732    | 0.70         | P <sub>0</sub> : 0.292<br>$\omega_0$ : 0.0<br>P <sub>1</sub> : 0.707<br>$\omega_1$ : 1.0                                                                                              |                    | -                                       |
| <b>M2 (Selection)*</b>                    | -731.444226    | 2.24         | P <sub>0</sub> : 0.239<br>$\omega_0$ : 0.0<br>P <sub>1</sub> : 0.370<br>$\omega_1$ : 1.0<br>P <sub>2</sub> : 0.390<br>$\omega_2$ : 4.78<br>P <sub>0</sub> : 0.343<br>$\omega_0$ : 0.0 | P << 0.001         | 3 (PP $\geq$ 0.99)<br>2 (P $\geq$ 0.95) |
| <b>M3 (Discrete)*</b>                     | -729.662821    | 2.60         | P <sub>1</sub> : 0.592<br>$\omega_1$ : 2.93<br>P <sub>2</sub> : 0.064<br>$\omega_2$ : 13.44                                                                                           | P << 0.001         | -                                       |
| <b>M7 (beta)</b>                          | -741.689003    | 0.70         | p: 0.01169<br>q: 0.00500<br>p <sub>0</sub> : 0.561<br>p: 0.005                                                                                                                        |                    | -                                       |
| <b>M8 (beta and <math>\omega</math>)*</b> | -731.500666    | 2.25         | q: 0.005<br>p <sub>1</sub> : 0.438<br>$\omega$ : 4.51                                                                                                                                 | P << 0.001         | 4 (PP $\geq$ 0.99)<br>5 (P > 0.95)      |

**Legend:**

**a:** dn/ds (weighted average)

**b:** Significance of the model in comparison with the null model

**c:** Number of sites with  $\omega > 1$  under the Bayes empirical Bayes approach with a posterior probability (PP) more than or equal to 0.99 and 0.95

\* Models which allow  $\omega > 1$

**Table S3.8** Maximum-likelihood parameter estimates for Anguimorpha neurotrophin-3

| Model                                     | Likelihood (l) | $\omega_0^a$ | Parameters                                                                                                                                                                            | Sign. <sup>b</sup> | No. of Sites with $\omega > 1^c$        | B.E.B |
|-------------------------------------------|----------------|--------------|---------------------------------------------------------------------------------------------------------------------------------------------------------------------------------------|--------------------|-----------------------------------------|-------|
| <b>M0 (One ratio)</b>                     | -744.714302    | 1.88         | = $\omega_0$                                                                                                                                                                          |                    |                                         | -     |
| <b>M1 (Neutral)</b>                       | -741.684732    | 0.70         | P <sub>0</sub> : 0.292<br>$\omega_0$ : 0.0<br>P <sub>1</sub> : 0.707<br>$\omega_1$ : 1.0                                                                                              |                    |                                         | -     |
| <b>M2 (Selection)*</b>                    | -731.444226    | 2.24         | P <sub>0</sub> : 0.239<br>$\omega_0$ : 0.0<br>P <sub>1</sub> : 0.370<br>$\omega_1$ : 1.0<br>P <sub>2</sub> : 0.390<br>$\omega_2$ : 4.78<br>P <sub>0</sub> : 0.343<br>$\omega_0$ : 0.0 | P << 0.001         | 3 (PP $\geq$ 0.99)<br>2 (P $\geq$ 0.95) |       |
| <b>M3 (Discrete)*</b>                     | -729.662821    | 2.60         | P <sub>1</sub> : 0.592<br>$\omega_1$ : 2.93<br>P <sub>2</sub> : 0.064<br>$\omega_2$ : 13.44                                                                                           | P << 0.001         |                                         | -     |
| <b>M7 (beta)</b>                          | -741.689003    | 0.70         | p: 0.01169<br>q: 0.00500<br>p <sub>0</sub> : 0.561<br>p: 0.005                                                                                                                        |                    |                                         | -     |
| <b>M8 (beta and <math>\omega</math>)*</b> | -731.500666    | 2.25         | q: 0.005<br>p <sub>1</sub> : 0.438<br>$\omega$ : 4.51                                                                                                                                 | P << 0.001         | 4 (PP $\geq$ 0.99)<br>5 (P > 0.95)      |       |

**Legend:**

**a:** dn/ds (weighted average)

**b:** Significance of the model in comparison with the null model

**c:** Number of sites with  $\omega > 1$  under the Bayes empirical Bayes approach with a posterior probability (PP) more than or equal to 0.99 and 0.95

\* Models which allow  $\omega > 1$



**Table S3.9** Maximum-likelihood parameter estimates for crocodilian neurotrophin-3

| Model                                     | Likelihood (l) | $\omega_0^a$ | Parameters                                                                                                                                        | Sign. <sup>b</sup> | No. of Sites with $\omega > 1^c$<br>B.E.B |
|-------------------------------------------|----------------|--------------|---------------------------------------------------------------------------------------------------------------------------------------------------|--------------------|-------------------------------------------|
| <b>M0 (One ratio)</b>                     | -744.714302    | 1.88         | = $\omega_0$                                                                                                                                      |                    | -                                         |
| <b>M1 (Neutral)</b>                       | -741.684732    | 0.70         | $P_0$ : 0.292<br>$\omega_0$ : 0.0<br>$P_1$ : 0.707<br>$\omega_1$ : 1.0                                                                            |                    | -                                         |
| <b>M2 (Selection)*</b>                    | -731.444226    | 2.24         | $P_0$ : 0.239<br>$\omega_0$ : 0.0<br>$P_1$ : 0.370<br>$\omega_1$ : 1.0<br>$P_2$ : 0.390<br>$\omega_2$ : 4.78<br>$P_0$ : 0.343<br>$\omega_0$ : 0.0 | $P \ll 0.001$      | 3 (PP $\geq 0.99$ )<br>2 (P $\geq 0.95$ ) |
| <b>M3 (Discrete)*</b>                     | -729.662821    | 2.60         | $P_1$ : 0.592<br>$\omega_1$ : 2.93<br>$P_2$ : 0.064<br>$\omega_2$ : 13.44                                                                         | $P \ll 0.001$      | -                                         |
| <b>M7 (beta)</b>                          | -741.689003    | 0.70         | p: 0.01169<br>q: 0.00500<br>$p_0$ : 0.561<br>p: 0.005                                                                                             |                    | -                                         |
| <b>M8 (beta and <math>\omega</math>)*</b> | -731.500666    | 2.25         | q: 0.005<br>p1: 0.438<br>$\omega$ : 4.51                                                                                                          | $P \ll 0.001$      | 4 (PP $\geq 0.99$ )<br>5 (P $> 0.95$ )    |

**Legend:**

**a:** dn/ds (weighted average)

**b:** Significance of the model in comparison with the null model

**c:** Number of sites with  $\omega > 1$  under the Bayes empirical Bayes approach with a posterior probability (PP) more than or equal to 0.99 and 0.95

\* Models which allow  $\omega > 1$

**Table S3.10** Maximum-likelihood parameter estimates for turtle neurotrophin-3

| Model                                     | Likelihood (l) | $\omega_0^a$ | Parameters                                                                                                                                                                            | Sign. <sup>b</sup> | No. of Sites with $\omega > 1^c$        | B.E.B |
|-------------------------------------------|----------------|--------------|---------------------------------------------------------------------------------------------------------------------------------------------------------------------------------------|--------------------|-----------------------------------------|-------|
| <b>M0 (One ratio)</b>                     | -744.714302    | 1.88         | = $\omega_0$                                                                                                                                                                          |                    |                                         | -     |
| <b>M1 (Neutral)</b>                       | -741.684732    | 0.70         | P <sub>0</sub> : 0.292<br>$\omega_0$ : 0.0<br>P <sub>1</sub> : 0.707<br>$\omega_1$ : 1.0                                                                                              |                    |                                         | -     |
| <b>M2 (Selection)*</b>                    | -731.444226    | 2.24         | P <sub>0</sub> : 0.239<br>$\omega_0$ : 0.0<br>P <sub>1</sub> : 0.370<br>$\omega_1$ : 1.0<br>P <sub>2</sub> : 0.390<br>$\omega_2$ : 4.78<br>P <sub>0</sub> : 0.343<br>$\omega_0$ : 0.0 | P << 0.001         | 3 (PP $\geq$ 0.99)<br>2 (P $\geq$ 0.95) |       |
| <b>M3 (Discrete)*</b>                     | -729.662821    | 2.60         | P <sub>1</sub> : 0.592<br>$\omega_1$ : 2.93<br>P <sub>2</sub> : 0.064<br>$\omega_2$ : 13.44                                                                                           | P << 0.001         |                                         | -     |
| <b>M7 (beta)</b>                          | -741.689003    | 0.70         | p: 0.01169<br>q: 0.00500<br>p <sub>0</sub> : 0.561<br>p: 0.005                                                                                                                        |                    |                                         | -     |
| <b>M8 (beta and <math>\omega</math>)*</b> | -731.500666    | 2.25         | q: 0.005<br>p <sub>1</sub> : 0.438<br>$\omega$ : 4.51                                                                                                                                 | P << 0.001         | 4 (PP $\geq$ 0.99)<br>5 (P $>$ 0.95)    |       |

**Legend:**

**a:** dn/ds (weighted average)

**b:** Significance of the model in comparison with the null model

**c:** Number of sites with  $\omega > 1$  under the Bayes empirical Bayes approach with a posterior probability (PP) more than or equal to 0.99 and 0.95

\* Models which allow  $\omega > 1$

**Table S3.11** Maximum-likelihood parameter estimates for mammalian neurotrophin-3

| Model                    | Likelihood (l) | $\omega_0^a$ | Parameters                                                                                                                                                                            | Sign. <sup>b</sup> | No. of Sites with $\omega > 1^c$        | B.E.B |
|--------------------------|----------------|--------------|---------------------------------------------------------------------------------------------------------------------------------------------------------------------------------------|--------------------|-----------------------------------------|-------|
| M0 (One ratio)           | -744.714302    | 1.88         | = $\omega_0$                                                                                                                                                                          |                    |                                         | -     |
| M1 (Neutral)             | -741.684732    | 0.70         | P <sub>0</sub> : 0.292<br>$\omega_0$ : 0.0<br>P <sub>1</sub> : 0.707<br>$\omega_1$ : 1.0                                                                                              |                    |                                         | -     |
| M2 (Selection)*          | -731.444226    | 2.24         | P <sub>0</sub> : 0.239<br>$\omega_0$ : 0.0<br>P <sub>1</sub> : 0.370<br>$\omega_1$ : 1.0<br>P <sub>2</sub> : 0.390<br>$\omega_2$ : 4.78<br>P <sub>0</sub> : 0.343<br>$\omega_0$ : 0.0 | P << 0.001         | 3 (PP $\geq$ 0.99)<br>2 (P $\geq$ 0.95) |       |
| M3 (Discrete)*           | -729.662821    | 2.60         | P <sub>1</sub> : 0.592<br>$\omega_1$ : 2.93<br>P <sub>2</sub> : 0.064<br>$\omega_2$ : 13.44                                                                                           | P << 0.001         |                                         | -     |
| M7 (beta)                | -741.689003    | 0.70         | p: 0.01169<br>q: 0.00500<br>p <sub>0</sub> : 0.561<br>p: 0.005                                                                                                                        |                    |                                         | -     |
| M8 (beta and $\omega$ )* | -731.500666    | 2.25         | q: 0.005<br>p <sub>1</sub> : 0.438<br>$\omega$ : 4.51                                                                                                                                 | P << 0.001         | 4 (PP $\geq$ 0.99)<br>5 (P > 0.95)      |       |

**Legend:**

**a:** dn/ds (weighted average)

**b:** Significance of the model in comparison with the null model

**c:** Number of sites with  $\omega > 1$  under the Bayes empirical Bayes approach with a posterior probability (PP) more than or equal to 0.99 and 0.95

\* Models which allow  $\omega > 1$
