# Supplementary material for: Molecular Evolution of Vertebrate Neurotrophins: Co-Option of the Highly Conserved Nerve Growth Factor Gene into the Advanced Snake Venom Arsenalf
Source: PubMed Central journal article supplement (PMC3843689; doi:10.1371/journal.pone.0081827), 2013-11-29
Supplement: pone.0081827.s004.pdf [file pone.0081827.s004.pdf]

**Table S4.** Lineage-specific estimates for Toxicofera nerve growth factors (NGF)

| Model                      | $\omega^a$  | Likelihood (l)       | Prop. of sites with $\omega > 1$ | Sign <sup>d</sup>                 |
|----------------------------|-------------|----------------------|----------------------------------|-----------------------------------|
| <b>Elapidae</b>            |             |                      |                                  |                                   |
| Two-ratio Model            | 0.85        | -7902.275528         | -                                | $p > 0.05^{NS}$                   |
| <b>Branch-site Model A</b> | <b>3.90</b> | <b>-7731.163474</b>  | <b>4.5%</b>                      | <b>*<math>p &lt; 0.001</math></b> |
| <b>Clade Model C</b>       | <b>2.38</b> | <b>-10800.007151</b> | <b>2.6%</b>                      | <b>*<math>p &lt; 0.001</math></b> |
| <b>Viperidae</b>           |             |                      |                                  |                                   |
| Two-ratio Model            | 0.82        | -7909.191912         | -                                | $p > 0.05^{NS}$                   |
| <b>Branch-site Model A</b> | <b>2.01</b> | <b>-7786.640851</b>  | <b>8.1%</b>                      | <b><math>p &lt; 0.05</math></b>   |
| <b>Clade Model C</b>       | <b>1.03</b> | <b>-10800.007151</b> | <b>2.6%</b>                      | <b>*<math>p &lt; 0.001</math></b> |

**Legend:**

**a:** dn/ds (weighted average)

**b:** Significance of the model in comparison with the null model

\* Significant after Bonferroni correction

**NS:** Not significant

Significantly detected positively selected lineages are highlighted in bold
