# Supplementary material for: Molecular Evolution of Vertebrate Neurotrophins: Co-Option of the Highly Conserved Nerve Growth Factor Gene into the Advanced Snake Venom Arsenalf
Source: PubMed Central journal article supplement (PMC3843689; doi:10.1371/journal.pone.0081827), 2013-11-29
Supplement: pone.0081827.s005.pdf [file pone.0081827.s005.pdf]

## Supplementary File S5.1 Nerve growth factor (NGF) sequence sets

| Elapidae |                             | Accession         | Viperidae                 |                              | Accession           |
|----------|-----------------------------|-------------------|---------------------------|------------------------------|---------------------|
| 1        | Bungarus multicinctus       | S56212.1          | 1                         | Agkistrodon contortrix       | EU437986.1          |
| 2        | Cacophis squamulosa         | GC_RL8_rep_c1593  | 2                         | Azemiops feae                | DQ139929.1          |
| 3        | Demansia vestigiata         | DQ917528.1        | 3                         | Azemiops feae                | Afe_RL4_rep_c388    |
| 4        | Demansia vestigiata         | DQ917526.1        | 4                         | Azemiops feae                | EU437992.1          |
| 5        | Demansia vestigiata         | DQ917527.1        | 5                         | Bitis gabonica               | AY430406.1          |
| 6        | Drysdalia coronoides        | HM627208.1        | 6                         | Bothrops asper               | EU437994.1          |
| 7        | Echiopsis curta             | Ecu_RL8_rep_c378  | 7                         | Bothrops jararacussu         | AY007318.1          |
| 8        | Echiopsis curta             | Ecu_RL8_rep_c757  | 8                         | Causus defilippi             | EU437997.1          |
| 9        | Furina ornata               | For_RL9_rep_c360  | 9                         | Crotalus adamanteus          | JU173670.1          |
| 10       | Furina ornata               | For_RL9_rep_c523  | 10                        | Crotalus durissus            | AF306533.1          |
| 11       | Hoplocephalus bungaroides   | Hbu_RL1_rep_c521  | 11                        | Crotalus o helleri           | CohCI9_RL3_c37      |
| 12       | Hoplocephalus bungaroides   | Hbu_RL1_rep_c597  | 12                        | Crotalus o helleri           | CohID2_RL5_rep_c250 |
| 13       | Hoplocephalus bungaroides   | Hbu_RL1_rep_c786  | 13                        | Crotalus o helleri           | CohLL5_RL4_rep_c451 |
| 14       | Hoplocephalus bungaroides   | Hbu_RL1_rep_c923  | 14                        | Crotalus o helleri           | CohLL5_RL4_rep_c668 |
| 15       | Hoplocephalus bungaroides   | Hbu_RL1_rep_c961  | 15                        | Crotalus o helleri           | CohPH1_RL6_rep_c413 |
| 16       | Hoplocephalus stephensii    | DQ181915.1        | 16                        | Daboia russellii             | EU438000.1          |
| 17       | Hoplocephalus stephensii    | DQ181916.1        | 17                        | Lachesis stenophrys          | EU438008.1          |
| 18       | Laticauda colubrina         | EU438011.1        | 18                        | Macrovipera lebetina         | AY740013.1          |
| 19       | Micrurus fulvius            | EU438017.1        | 19                        | Sistrurus catenatus edwardsi | DQ464261.1          |
| 20       | Naja kaouthia               | EU438018.1        | 20                        | Protobothrops flavoviridis   | AB362782.1          |
| 21       | Naja sputatrix              | AY527216.1        | <b>'Non-front-fanged'</b> |                              | <b>Accession</b>    |
| 22       | Naja sputatrix              | AY527215.1        | 1                         | Afronatrix anoscopus         | EU437985.1          |
| 23       | Notechis scutatus           | DQ181908.1        | 2                         | Amphiesma stolata            | EU437987.1          |
| 24       | Notechis scutatus           | DQ181910.1        | 3                         | Coluber constrictor          | EU437998.1          |
| 25       | Notechis scutatus           | DQ181909.1        | 4                         | Diadophis punctatus          | EU438001.1          |
| 26       | Notechis scutatus           | EU438020.1        | 5                         | Heterodon platirhinos        | EU438005.1          |
| 27       | Oxyuranus microlepidotus    | DQ181904.1        | 6                         | Imantodes cenchoa            | EU438007.1          |
| 28       | Oxyuranus microlepidotus    | DQ181905.1        | 7                         | Lampropeltis getula          | EU438009.1          |
| 29       | Oxyuranus scutellatus       | DQ084064.1        | 8                         | Natrix natrix                | EU438019.1          |
| 30       | Parasuta nigriceps          | FJ790485.1        | 9                         | Sonora semiannulata          | EU438023.1          |
| 31       | Pseudechis australis        | DQ181912.1        | 10                        | Thamnophis marcianus         | EU438024.1          |
| 32       | Pseudechis australis        | DQ181914.1        | 11                        | Trimorphodon biscutatus      | EU438026.1          |
| 33       | Pseudechis australis        | DQ181913.1        | 12                        | Xenochrophis piscator        | EU438030.1          |
| 34       | Pseudechis porphyriacus     | DQ181911.1        | <b>Henophidia</b>         |                              | <b>Accession</b>    |
| 35       | Pseudonaja modesta          | Pmo_RL10_rep_c337 | 1                         | Boa constrictor              | EU437993.1          |
| 36       | Pseudonaja textilis         | DQ181907.1        | 2                         | Calabaria reinhardtii        | EU437995.1          |
| 37       | Pseudonaja textilis         | DQ181906.1        | 3                         | Casarea dussumieri           | EU437996.1          |
| 38       | Rhinoplocephalus nigrescens | DQ422727.1        | 4                         | Charina trivirgata           | EU438013.1          |
| 39       | Simoselaps roperi           | Bse_RL2_rep_c1017 | 5                         | Cylindrophis ruffus          | EU437999.1          |
| 40       | Simoselaps roperi           | Bse_RL2_rep_c1023 | 6                         | Epicrates striatus           | EU438002.1          |
| 41       | Simoselaps roperi           | Bse_RL2_rep_c1058 | 7                         | Eryx colubrinus              | EU438003.1          |
| 42       | Simoselaps roperi           | Bse_RL2_rep_c1060 | 8                         | Exiliboa placata             | EU438004.1          |
| 43       | Simoselaps roperi           | Bse_RL2_rep_c1086 | 9                         | Loxocemus bicolor            | EU438015.1          |
| 44       | Simoselaps roperi           | Bse_RL2_rep_c1103 | 10                        | Python molurus               | EU437990.1          |
| 45       | Simoselaps roperi           | Bse_RL2_rep_c1131 | 11                        | Python molurus               | EU438022.1          |
| 46       | Simoselaps roperi           | Bse_RL2_rep_c1310 | 12                        | Xenopeltis unicolor          | EU438032.1          |
| 47       | Simoselaps roperi           | Bse_RL2_rep_c2194 |                           |                              |                     |
| 48       | Simoselaps roperi           | Bse_RL2_rep_c3514 |                           |                              |                     |
| 49       | Simoselaps roperi           | Bse_RL2_rep_c4864 |                           |                              |                     |

|    |                              |                   |    |                          |                  |
|----|------------------------------|-------------------|----|--------------------------|------------------|
| 50 | <i>Simoselaps roperi</i>     | Bse_RL2_rep_c4921 | 60 | <i>Denisonia devisii</i> | Dde_RL7_rep_c182 |
| 51 | <i>Simoselaps roperi</i>     | Bse_RL2_rep_c895  | 61 | <i>Denisonia devisii</i> | Dde_RL7_rep_c307 |
| 52 | <i>Simoselaps roperi</i>     | Bse_RL2_rep_c972  |    |                          |                  |
| 53 | <i>Tropidechis carinatus</i> | DQ181919.1        |    |                          |                  |
| 54 | <i>Tropidechis carinatus</i> | DQ181918.1        |    |                          |                  |
| 55 | <i>Tropidechis carinatus</i> | DQ181920.1        |    |                          |                  |
| 56 | <i>Tropidechis carinatus</i> | DQ181921.1        |    |                          |                  |
| 57 | <i>Tropidechis carinatus</i> | DQ181917.1        |    |                          |                  |
| 58 | <i>Vermicella annulata</i>   | Van_RL12_rep_c317 |    |                          |                  |
| 59 | <i>Vermicella annulata</i>   | Van_RL12_rep_c673 |    |                          |                  |

| <b>Iguania</b> |                                    | <b>Accession</b> | <b>Gekkota</b> |                                  | <b>Accession</b> |
|----------------|------------------------------------|------------------|----------------|----------------------------------|------------------|
| 1              | <i>Acanthosaura lepidogaster</i>   | JF818319.1       | 1              | <i>Coleonyx variegatus</i>       | JF818314.1       |
| 2              | <i>Anolis carolinensis</i>         | EU437979.1       | 2              | <i>Eublepharis macularius</i>    | GU432729.1       |
| 3              | <i>Basiliscus basiliscus</i>       | JF818336.1       | 3              | <i>Gekko gecko</i>               | EU437977.1       |
| 4              | <i>Brachylophus fasciatus</i>      | JF818341.1       | 4              | <i>Gonatodes albogularis</i>     | GU432731.1       |
| 5              | <i>Chalarodon madagascariensis</i> | JF818349.1       | 5              | <i>Hemidactylus brookii</i>      | HM180146.1       |
| 6              | <i>Chamaeleo calyptratus</i>       | GU432713.1       | 6              | <i>Hemidactylus coalescens</i>   | HM180179.1       |
| 7              | <i>Chlamydosaurus kingii</i>       | JF818322.1       | 7              | <i>Hemidactylus coalescens</i>   | HM180177.1       |
| 8              | <i>Corytophanes cristatus</i>      | JF818337.1       | 8              | <i>Hemidactylus coalescens</i>   | HM180143.1       |
| 9              | <i>Crotaphytus collaris</i>        | JF818338.1       | 9              | <i>Hemidactylus coalescens</i>   | HM180180.1       |
| 10             | <i>Ctenophorus isolepis</i>        | JF818323.1       | 10             | <i>Hemidactylus coalescens</i>   | HM180178.1       |
| 11             | <i>Dipsosaurus dorsalis</i>        | JF818342.1       | 11             | <i>Hemidactylus coalescens</i>   | HM180176.1       |
| 12             | <i>Draco blanfordii</i>            | JF818324.1       | 12             | <i>Hemidactylus eniangii</i>     | HM180175.1       |
| 13             | <i>Enyalioides laticeps</i>        | GU432714.1       | 13             | <i>Hemidactylus eniangii</i>     | HM180173.1       |
| 14             | <i>Gambelia wislizenii</i>         | JF818339.1       | 14             | <i>Hemidactylus eniangii</i>     | HM180141.1       |
| 15             | <i>Hypsilurus boydii</i>           | JF818326.1       | 15             | <i>Hemidactylus eniangii</i>     | HM180139.1       |
| 16             | <i>Leiocephalus barahonensis</i>   | JF818356.1       | 16             | <i>Hemidactylus eniangii</i>     | HM180137.1       |
| 17             | <i>Leiolepis belliana</i>          | JF818335.1       | 17             | <i>Hemidactylus eniangii</i>     | HM180174.1       |
| 18             | <i>Leiosaurus catamarcensis</i>    | JF818344.1       | 18             | <i>Hemidactylus eniangii</i>     | HM180142.1       |
| 19             | <i>Liolaemus bellii</i>            | JF818347.1       | 19             | <i>Hemidactylus eniangii</i>     | HM180140.1       |
| 20             | <i>Morunasaurus annularis</i>      | JF818340.1       | 20             | <i>Hemidactylus fasciatus</i>    | HM180159.1       |
| 21             | <i>Oplurus cyclurus</i>            | GU432716.1       | 21             | <i>Hemidactylus fasciatus</i>    | HM180157.1       |
| 22             | <i>Petrosaurus mearnsi</i>         | JF818350.1       | 22             | <i>Hemidactylus fasciatus</i>    | HM180155.1       |
| 23             | <i>Phrynocephalus mystaceus</i>    | JF818328.1       | 23             | <i>Hemidactylus fasciatus</i>    | HM180153.1       |
| 24             | <i>Phrynosoma platyrhinos</i>      | JF818351.1       | 24             | <i>Hemidactylus fasciatus</i>    | HM180151.1       |
| 25             | <i>Phymaturus palluma</i>          | JF818348.1       | 25             | <i>Hemidactylus fasciatus</i>    | HM180149.1       |
| 26             | <i>Physignathus lesueurii</i>      | JF818330.1       | 26             | <i>Hemidactylus fasciatus</i>    | HM180145.1       |
| 27             | <i>Pogona vitticeps</i>            | JF818331.1       | 27             | <i>Hemidactylus fasciatus</i>    | HM180158.1       |
| 28             | <i>Polychrus marmoratus</i>        | JF818355.1       | 28             | <i>Hemidactylus fasciatus</i>    | HM180156.1       |
| 29             | <i>Pristidactylus torquatus</i>    | JF818345.1       | 29             | <i>Hemidactylus fasciatus</i>    | HM180154.1       |
| 30             | <i>Saara hardwickii</i>            | GU432715.1       | 30             | <i>Hemidactylus fasciatus</i>    | HM180152.1       |
| 31             | <i>Sauromalus ater</i>             | JF818343.1       | 31             | <i>Hemidactylus fasciatus</i>    | HM180144.1       |
| 32             | <i>Sceloporus variabilis</i>       | JF818352.1       | 32             | <i>Hemidactylus kyaboboensis</i> | HM180171.1       |
| 33             | <i>Stenocercus guentheri</i>       | JF818357.1       | 33             | <i>Hemidactylus kyaboboensis</i> | HM180169.1       |
| 34             | <i>Tropidurus plica</i>            | JF818358.1       | 34             | <i>Hemidactylus kyaboboensis</i> | HM180167.1       |
| 35             | <i>Uma scoparia</i>                | JF818353.1       | 35             | <i>Hemidactylus kyaboboensis</i> | HM180165.1       |
| 36             | <i>Uranoscodon superciliosus</i>   | JF818359.1       | 36             | <i>Hemidactylus kyaboboensis</i> | HM180163.1       |
| 37             | <i>Urostrophus vautieri</i>        | JF818346.1       | 37             | <i>Hemidactylus kyaboboensis</i> | HM180161.1       |
| 38             | <i>Uta stansburiana</i>            | JF818354.1       | 38             | <i>Hemidactylus kyaboboensis</i> | HM180172.1       |
|                |                                    |                  | 39             | <i>Hemidactylus kyaboboensis</i> | HM180170.1       |

| Laterata                 | Accession  |
|--------------------------|------------|
| 1 Amphisbaena alba       | GU432741.1 |
| 2 Aspidoscelis tigris    | EU437982.1 |
| 3 Bipes canaliculatus    | GU432742.1 |
| 4 Lacerta viridis        | GU432740.1 |
| 5 Pholidobolus macbrydei | GU432739.1 |
| 6 Rhineura floridana     | GU432743.1 |
| 7 Trogonophis wiegmanni  | GU432744.1 |

|                              |            |
|------------------------------|------------|
| 40 Hemidactylus kyaboboensis | HM180168.1 |
| 41 Hemidactylus kyaboboensis | HM180166.1 |
| 42 Hemidactylus kyaboboensis | HM180164.1 |
| 43 Hemidactylus kyaboboensis | HM180162.1 |
| 44 Hemidactylus kyaboboensis | HM180160.1 |
| 45 Hemidactylus kyaboboensis | HM180150.1 |
| 46 Hemidactylus kyaboboensis | HM180148.1 |
| 47 Saltuarius cornutus       | JF818315.1 |
| 48 Strophurus ciliaris       | GU432730.1 |

| Scinciformata                 | Accession  |
|-------------------------------|------------|
| 1 Acontias meleagris          | GU432735.1 |
| 2 Cordylosaurus subtesselatus | JF818316.1 |
| 3 Cordylus mossambicus        | GU432734.1 |
| 4 Feylinia polylepis          | GU432736.1 |
| 5 Lepidophyma flavimaculatum  | GU432738.1 |
| 6 Scincus scincus             | GU432737.1 |
| 7 Xantusia vigilis            | EU437983.1 |

| Mammals                  | Accession      |
|--------------------------|----------------|
| 1 Bos taurus             | NM_001099362.1 |
| 2 Bos taurus             | Y09566.1       |
| 3 Canis familiaris       | AY800386.1     |
| 4 Canis lupus familiaris | NM_001194950.1 |
| 5 Gorilla gorilla        | AY091926.1     |
| 6 Gorilla gorilla        | AB037519.1     |
| 7 Homo sapiens           | AB489186.1     |
| 8 Homo sapiens           | NG_007944.1    |
| 9 Homo sapiens           | NM_002506.2    |
| 10 Homo sapiens          | HQ258125.1     |
| 11 Homo sapiens          | BT019733.1     |
| 12 Homo sapiens          | AF411526.1     |
| 13 Homo sapiens          | AF150960.1     |
| 14 Homo sapiens          | AL049825.18    |
| 15 Homo sapiens          | X52599.1       |
| 16 Homo sapiens          | BC126150.1     |
| 17 Homo sapiens          | BC126148.1     |
| 18 Homo sapiens          | V01511.1       |
| 19 Homo sapiens          | CR541855.1     |
| 20 Homo sapiens          | X53655.1       |
| 21 Macaca fuscata        | AF222682.1     |
| 22 Macaca sp.            | AY091928.1     |
| 23 Mus musculus          | NM_001112698.1 |
| 24 Mus musculus          | NM_013609.2    |
| 25 Mus musculus          | AK144588.1     |
| 26 Mus musculus          | BC156604.1     |
| 27 Mus musculus          | K01759.1       |
| 28 Mus musculus          | V00836.1       |
| 29 Mus sp                | M14805.1       |
| 30 Mus sp                | M35075.1       |
| 31 Pan troglodytes       | NM_001012437.1 |
| 32 Pan troglodytes       | AY091925.1     |
| 33 Pongo pygmaeus        | AY091927.1     |
| 34 Pongo pygmaeus        | AB037520.1     |
| 35 Praomys natalensis    | M22748.1       |
| 36 Rattus norvegicus     | M36589.1       |
| 37 Saimiri boliviensis   | AY665218.1     |
| 38 Sus scrofa            | L31898.1       |

| Anguimorpha                | Accession         |
|----------------------------|-------------------|
| 1 Anniella pulchra         | GU432718.1        |
| 2 Elgaria multicarinata    | GU432720.1        |
| 3 Heloderma horridum       | GU432721.1        |
| 4 Heloderma suspectum      | GU432722.1        |
| 5 Heloderma suspectum      | EU790966.1        |
| 6 Lanthanotus borneensis   | GU432725.1        |
| 7 Pseudopus apodus         | GU432717.1        |
| 8 Shinisaurus crocodilurus | GU432723.1        |
| 9 Varanus exanthematicus   | GU432727.1        |
| 10 Varanus salvator        | EU437981.1        |
| 11 Xenosaurus grandis      | GU432724.1        |
| 12 Xenosaurus platyceps    | EU437980.1        |
| 13 Varanus acanthurus      | GU432726.1        |
| 14 Celestus enneagrammus   | GU432719.1        |
| 15 Varanus acanthurus      | DQ139928.1        |
| 16 Abronia gramminea       | Abro_RL8_rep_c474 |
| 17 Abronia gramminea       | Abro_RL8_rep_c785 |
| 18 Heloderma suspectum     | Hsu_RL11_rep_c662 |

| Turtles                   | Accession  |
|---------------------------|------------|
| 1 Actinemys marmorata     | GU085534.1 |
| 2 Actinemys marmorata     | GQ896037.1 |
| 3 Batagur trivittata      | GU085527.1 |
| 4 Carettochelys insculpta | GU085528.1 |
| 5 Chelonia mydas          | GU085529.1 |
| 6 Chelydra serpentina     | GU085531.1 |
| 7 Chrysemys picta         | GQ896038.1 |
| 8 Clemmys guttata         | GQ896039.1 |
| 9 Deirochelys reticularia | GQ896040.1 |
| 10 Dermochelys coriacea   | GU085532.1 |
| 11 Dogania subplana       | GU085533.1 |
| 12 Emydoidea blandingii   | GQ896041.1 |

|    |                                    |            |
|----|------------------------------------|------------|
| 13 | <i>Emys orbicularis</i>            | GQ896042.1 |
| 14 | <i>Glyptemys insculpta</i>         | GQ896043.1 |
| 15 | <i>Glyptemys muhlenbergii</i>      | GQ896044.1 |
| 16 | <i>Graptemys barbouri</i>          | GQ896045.1 |
| 17 | <i>Graptemys caglei</i>            | GQ896046.1 |
| 18 | <i>Graptemys flavimaculata</i>     | GQ896047.1 |
| 19 | <i>Graptemys geographica</i>       | GQ896048.1 |
| 20 | <i>Graptemys gibbonsi</i>          | GQ896049.1 |
| 21 | <i>Graptemys nigrinoda</i>         | GQ896050.1 |
| 22 | <i>Graptemys ouachitensis</i>      | GQ896052.1 |
| 23 | <i>Graptemys ouachitensis</i>      | GQ896051.1 |
| 24 | <i>Graptemys pseudogeographica</i> | GQ896053.1 |
| 25 | <i>Graptemys pulchra</i>           | GQ896054.1 |
| 26 | <i>Graptemys versa</i>             | GQ896055.1 |
| 27 | <i>Kinosternon flavescens</i>      | GU085535.1 |
| 28 | <i>Macrochelys temminckii</i>      | GU085538.1 |
| 29 | <i>Malaclemys terrapin</i>         | GQ896056.1 |
| 30 | <i>Malaclemys terrapin</i>         | GQ896057.1 |
| 31 | <i>Manouria emys</i>               | GU085536.1 |
| 32 | <i>Mauremys reevesii</i>           | GU085537.1 |
| 33 | <i>Pelodiscus sinensis</i>         | GU085541.1 |
| 34 | <i>Pseudemys concinna</i>          | GQ896058.1 |
| 35 | <i>Pseudemys gorzugi</i>           | GQ896059.1 |
| 36 | <i>Pseudemys nelsoni</i>           | GQ896060.1 |
| 37 | <i>Pseudemys peninsularis</i>      | GQ896061.1 |
| 38 | <i>Pseudemys rubriventris</i>      | GQ896062.1 |
| 39 | <i>Pseudemys texana</i>            | GQ896063.1 |
| 40 | <i>Rhinoclemmys annulata</i>       | GU085543.1 |
| 41 | <i>Sternotherus odoratus</i>       | GU085544.1 |
| 42 | <i>Terrapene carolina</i>          | GQ896065.1 |
| 43 | <i>Terrapene coahuila</i>          | GQ896066.1 |
| 44 | <i>Testudo graeca</i>              | GU085545.1 |
| 45 | <i>Trachemys scripta</i>           | GQ896072.1 |
| 46 | <i>Trachemys scripta</i>           | GQ896070.1 |
| 47 | <i>Trachemys scripta</i>           | GQ896071.1 |

**Note:** Unpublished sequences are available in supplementary file 2

## Supplementary File S5.2 Brain-derived neurotrophic factor (BDNF) sequence sets

| <b>Elapidae</b> |                                | <b>Accession</b> | <b>Viperidae</b> |                               | <b>Accession</b> |
|-----------------|--------------------------------|------------------|------------------|-------------------------------|------------------|
| 1               | <i>Bungarus fasciatus</i>      | FJ433989.1       | 1                | <i>Agkistrodon contortrix</i> | EU402623.1       |
| 2               | <i>Dendroaspis angusticeps</i> | FJ433988.1       | 2                | <i>Azemiops feae</i>          | EU402628.1       |
| 3               | <i>Elapsoidea semiannulata</i> | FJ433987.1       | 3                | <i>Bothriechis schlegelii</i> | FJ433983.1       |
| 4               | <i>Laticauda colubrina</i>     | EU402647.1       | 4                | <i>Bothrops asper</i>         | EU402630.1       |
| 5               | <i>Laticauda colubrina</i>     | FJ433990.1       | 5                | <i>Bothrops atrox</i>         | DQ469794.1       |
| 6               | <i>Micrurus fulvius</i>        | EU402653.1       | 6                | <i>Causus defilippi</i>       | EU402633.1       |
| 7               | <i>Micrurus surinamensis</i>   | FJ433991.1       | 7                | <i>Daboia russellii</i>       | EU402636.1       |
| 8               | <i>Naja kaouthia</i>           | EU402654.1       | 8                | <i>Lachesis stenophrys</i>    | EU402644.1       |
| 9               | <i>Notechis scutatus</i>       | EU402656.1       |                  |                               |                  |

| <b>'Non-front-fanged'</b> |                              | <b>Accession</b> | <b>Typhlopidae</b> |                                      | <b>Accession</b> |
|---------------------------|------------------------------|------------------|--------------------|--------------------------------------|------------------|
| 1                         | <i>Amphiesma stolata</i>     | EU402624.1       | 1                  | <i>Acutotyphlops</i> sp.             | GU902459.1       |
| 2                         | <i>Calamaria pavementata</i> | FJ434005.1       | 2                  | <i>Acutotyphlops subocularis</i>     | GU902418.1       |
| 3                         | <i>Contia longicaudae</i>    | GU112371.1       | 3                  | <i>Afrottyphlops fornasinii</i>      | GU902447.1       |
| 4                         | <i>Contia longicaudae</i>    | GU112369.1       | 4                  | <i>Afrottyphlops lineolatus</i>      | GU902451.1       |
| 5                         | <i>Contia longicaudae</i>    | GU112367.1       | 5                  | <i>Ramphotyphlops endoterus</i>      | GU902399.1       |
| 6                         | <i>Contia longicaudae</i>    | GU112365.1       | 6                  | <i>Ramphotyphlops ganei</i>          | GU902412.1       |
| 7                         | <i>Contia longicaudae</i>    | GU112372.1       | 7                  | <i>Ramphotyphlops guentheri</i>      | GU902404.1       |
| 8                         | <i>Contia longicaudae</i>    | GU112368.1       | 8                  | <i>Ramphotyphlops howi</i>           | GU902414.1       |
| 9                         | <i>Contia longicaudae</i>    | GU112366.1       | 9                  | <i>Ramphotyphlops kimberleyensis</i> | GU902406.1       |
| 10                        | <i>Contia longicaudae</i>    | GU112364.1       | 10                 | <i>Ramphotyphlops splendidus</i>     | GU902416.1       |
| 11                        | <i>Contia tenuis</i>         | GU112363.1       | 11                 | <i>Letheobia unitaeniata</i>         | GU902452.1       |
| 12                        | <i>Contia tenuis</i>         | GU112361.1       | 12                 | <i>Megatyphlops schlegelii</i>       | GU902449.1       |
| 13                        | <i>Contia tenuis</i>         | GU112359.1       | 13                 | <i>Ramphotyphlops albiceps</i>       | GU902382.1       |
| 14                        | <i>Contia tenuis</i>         | GU112357.1       | 14                 | <i>Ramphotyphlops braminus</i>       | FJ433959.1       |
| 15                        | <i>Contia tenuis</i>         | GU112355.1       | 15                 | <i>Ramphotyphlops lineatus</i>       | GU902384.1       |
| 16                        | <i>Contia tenuis</i>         | GU112353.1       | 16                 | <i>Ramphotyphlops longissimus</i>    | GU902408.1       |
| 17                        | <i>Contia tenuis</i>         | GU112351.1       | 17                 | <i>Ramphotyphlops pilbarensis</i>    | GU902400.1       |
| 18                        | <i>Contia tenuis</i>         | GU112349.1       | 18                 | <i>Ramphotyphlops</i> sp.            | GU902420.1       |
| 19                        | <i>Contia tenuis</i>         | GU112347.1       | 19                 | <i>Ramphotyphlops waitii</i>         | GU902402.1       |
| 20                        | <i>Contia tenuis</i>         | GU112345.1       | 20                 | <i>Rhinotyphlops lalandei</i>        | GU902386.1       |
| 21                        | <i>Contia tenuis</i>         | GU112343.1       | 21                 | <i>Rhinotyphlops newtoni</i>         | GU902388.1       |
| 22                        | <i>Contia tenuis</i>         | GU112341.1       | 22                 | <i>Typhlops agoralionis</i>          | GU902422.1       |
| 23                        | <i>Contia tenuis</i>         | GU112339.1       | 23                 | <i>Typhlops andasibensis</i>         | GU902453.1       |
| 24                        | <i>Contia tenuis</i>         | GU112337.1       | 24                 | <i>Typhlops arator</i>               | GU902424.1       |
| 25                        | <i>Contia tenuis</i>         | GU112360.1       | 25                 | <i>Typhlops catapontus</i>           | GU902426.1       |
| 26                        | <i>Contia tenuis</i>         | GU112358.1       | 26                 | <i>Typhlops contorhinus</i>          | GU902446.1       |
| 27                        | <i>Contia tenuis</i>         | GU112356.1       | 27                 | <i>Typhlops dominicanus</i>          | GU902428.1       |
| 28                        | <i>Contia tenuis</i>         | GU112354.1       | 28                 | <i>Typhlops granti</i>               | GU902430.1       |
| 29                        | <i>Contia tenuis</i>         | GU112350.1       | 29                 | <i>Typhlops hedraeus</i>             | GU902392.1       |
| 30                        | <i>Contia tenuis</i>         | GU112348.1       | 30                 | <i>Typhlops jamaicensis</i>          | EU402664.1       |
| 31                        | <i>Contia tenuis</i>         | GU112346.1       | 31                 | <i>Typhlops jamaicensis</i>          | GU902432.1       |
| 32                        | <i>Contia tenuis</i>         | GU112342.1       | 32                 | <i>Typhlops lumbricalis</i>          | FJ433958.1       |
| 33                        | <i>Contia tenuis</i>         | GU112340.1       | 33                 | <i>Typhlops mirus</i>                | GU902394.1       |
| 34                        | <i>Contia tenuis</i>         | GU112338.1       | 34                 | <i>Typhlops monastus</i>             | GU902434.1       |
| 35                        | <i>Cyclophiops major</i>     | AF497715.1       | 35                 | <i>Typhlops notorachius</i>          | GU902436.1       |
| 36                        | <i>Diadophis punctatus</i>   | FJ433997.1       | 36                 | <i>Typhlops pammeceus</i>            | GU902458.1       |
| 37                        | <i>Diadophis punctatus</i>   | EU402637.1       | 37                 | <i>Typhlops reticulatus</i>          | GU902396.1       |
| 38                        | <i>Diadophis punctatus</i>   | GU112373.1       | 38                 | <i>Typhlops richardi</i>             | GU902438.1       |

|    |                                    |            |    |                                 |            |
|----|------------------------------------|------------|----|---------------------------------|------------|
| 39 | <i>Grayia ornata</i>               | FJ434002.1 | 39 | <i>Typhlops schwartzi</i>       | GU902440.1 |
| 40 | <i>Hapsidophrys smaragdina</i>     | FJ434003.1 | 40 | <i>Typhlops</i> sp.             | GU902460.1 |
| 41 | <i>Heterodon platirhinos</i>       | GU112374.1 | 41 | <i>Typhlops</i> sp.             | GU902454.1 |
| 42 | <i>Imantodes cenchoa</i>           | EU402643.1 | 42 | <i>Typhlops sylleptor</i>       | GU902442.1 |
| 43 | <i>Lampropeltis getula</i>         | EU402645.1 | 43 | <i>Xenotyphlops grandidieri</i> | GU902457.1 |
| 44 | <i>Liophis lineatus</i>            | DQ469795.1 | 44 | <i>Xenotyphlops</i> sp.         | GU902456.1 |
| 45 | <i>Natrix natrix</i>               | EU402655.1 |    |                                 |            |
| 46 | <i>Phyllorhynchus decurtatus</i>   | FJ434004.1 |    |                                 |            |
| 47 | <i>Pseudoxenodon bambusicola</i>   | FJ434000.1 |    |                                 |            |
| 48 | <i>Sonora semiannulata</i>         | EU402659.1 |    |                                 |            |
| 49 | <i>Thamnophis marcianus</i>        | EU402660.1 |    |                                 |            |
| 50 | <i>Trimorphodon biscutatus</i>     | EU402662.1 |    |                                 |            |
| 51 | <i>Xenochrophis flavipunctatus</i> | FJ434001.1 |    |                                 |            |
| 52 | <i>Xenochrophis piscator</i>       | EU402666.1 |    |                                 |            |

|   | <b>Pythonidae</b>               | <b>Accession</b> |
|---|---------------------------------|------------------|
| 1 | <i>Apodora papuana</i>          | FJ433971.1       |
| 2 | <i>Aspidites melanocephala</i>  | DQ465559.1       |
| 3 | <i>Aspidites melanocephalus</i> | EU402627.1       |
| 4 | <i>Liasis savuensis</i>         | FJ433970.1       |
| 5 | <i>Morelia spilota</i>          | AY988035.1       |
| 6 | <i>Python molurus</i>           | EU402658.1       |
| 7 | <i>Python reticulatus</i>       | FJ433969.1       |

| <b>Boidae</b> | <b>Accession</b>                    | <b>Anguimorpha</b> | <b>Accession</b>             |            |
|---------------|-------------------------------------|--------------------|------------------------------|------------|
| 1             | <i>Acrantophis dumerili</i>         | 1                  | <i>Anniella geronimensis</i> | EU445907.1 |
| 2             | <i>Acrantophis madagascariensis</i> | 2                  | <i>Anniella geronimensis</i> | EU445908.1 |
| 3             | <i>Acrantophis madagascariensis</i> | 3                  | <i>Anniella geronimensis</i> | EU445909.1 |
| 4             | <i>Boa constrictor</i>              | 4                  | <i>Anniella pulchra</i>      | EU445844.1 |
| 5             | <i>Boa constrictor</i>              | 5                  | <i>Anniella pulchra</i>      | EU445845.1 |
| 6             | <i>Calabaria reinhardtii</i>        | 6                  | <i>Anniella pulchra</i>      | EU445846.1 |
| 7             | <i>Calabaria reinhardtii</i>        | 7                  | <i>Anniella pulchra</i>      | EU445847.1 |
| 8             | <i>Candoia carinata</i>             | 8                  | <i>Anniella pulchra</i>      | EU445848.1 |
| 9             | <i>Charina bottae</i>               | 9                  | <i>Anniella pulchra</i>      | EU445849.1 |
| 10            | <i>Charina bottae</i> BDNF          | 10                 | <i>Anniella pulchra</i>      | EU445850.1 |
| 11            | <i>Charina trivirgata</i>           | 11                 | <i>Anniella pulchra</i>      | EU445851.1 |
| 12            | <i>Charina trivirgata</i>           | 12                 | <i>Anniella pulchra</i>      | EU445852.1 |
| 13            | <i>Corallus caninus</i>             | 13                 | <i>Anniella pulchra</i>      | EU445858.1 |
| 14            | <i>Eryx colubrinus</i>              | 14                 | <i>Anniella pulchra</i>      | EU445859.1 |
| 15            | <i>Eryx conicus</i>                 | 15                 | <i>Anniella pulchra</i>      | EU445860.1 |
| 16            | <i>Eryx miliaris</i>                | 16                 | <i>Anniella pulchra</i>      | EU445861.1 |
| 17            | <i>Gongylophis colubrinus</i>       | 17                 | <i>Anniella pulchra</i>      | EU445862.1 |
| 18            | <i>Sanzinia madagascariensis</i>    | 18                 | <i>Anniella pulchra</i>      | EU445863.1 |
|               |                                     | 19                 | <i>Anniella pulchra</i>      | EU445864.1 |
|               |                                     | 20                 | <i>Anniella pulchra</i>      | EU445865.1 |
|               |                                     | 21                 | <i>Anniella pulchra</i>      | EU445866.1 |
|               |                                     | 22                 | <i>Anniella pulchra</i>      | EU445867.1 |
|               |                                     | 23                 | <i>Anniella pulchra</i>      | EU445868.1 |
|               |                                     | 24                 | <i>Anniella pulchra</i>      | EU445869.1 |
|               |                                     | 25                 | <i>Anniella pulchra</i>      | EU445870.1 |
|               |                                     | 26                 | <i>Anniella pulchra</i>      | EU445871.1 |
|               |                                     | 27                 | <i>Anniella pulchra</i>      | EU445872.1 |
|               |                                     | 28                 | <i>Anniella pulchra</i>      | EU445873.1 |
|               |                                     | 29                 | <i>Anniella pulchra</i>      | EU445874.1 |
|               |                                     | 30                 | <i>Anniella pulchra</i>      | EU445875.1 |
|               |                                     | 31                 | <i>Anniella pulchra</i>      | EU445876.1 |
|               |                                     | 32                 | <i>Anniella pulchra</i>      | EU445877.1 |
|               |                                     | 33                 | <i>Anniella pulchra</i>      | EU445878.1 |
|               |                                     | 34                 | <i>Anniella pulchra</i>      | EU445879.1 |
|               |                                     | 35                 | <i>Anniella pulchra</i>      | EU445880.1 |

| <b>Iguania</b> | <b>Accession</b>              |            |
|----------------|-------------------------------|------------|
| 1              | <i>Anolis acutus</i>          | EU544058.1 |
| 2              | <i>Anolis cooki</i>           | EU544066.1 |
| 3              | <i>Anolis cristatellus</i>    | EU544074.1 |
| 4              | <i>Anolis cristatellus</i>    | EU544072.1 |
| 5              | <i>Anolis cristatellus</i>    | EU544070.1 |
| 6              | <i>Anolis cristatellus</i>    | EU544073.1 |
| 7              | <i>Anolis desecheensis</i>    | EU544068.1 |
| 8              | <i>Anolis distichus</i>       | EU544057.1 |
| 9              | <i>Anolis ernestwilliamsi</i> | EU544069.1 |
| 10             | <i>Anolis gundlachi</i>       | EU544060.1 |
| 11             | <i>Anolis krugi</i>           | EU544061.1 |
| 12             | <i>Anolis monensis</i>        | EU544067.1 |
| 13             | <i>Anolis poncensis</i>       | EU544062.1 |
| 14             | <i>Anolis pulchellus</i>      | EU544063.1 |
| 15             | <i>Anolis scriptus</i>        | EU544065.1 |

|    |                                    |            |
|----|------------------------------------|------------|
| 16 | <i>Anolis stratulus</i>            | EU544064.1 |
| 17 | <i>Basiliscus basiliscus</i>       | JF806017.1 |
| 18 | <i>Brachylophus fasciatus</i>      | JF806018.1 |
| 19 | <i>Chalarodon madagascariensis</i> | JF806019.1 |
| 20 | <i>Corytophanes cristatus</i>      | JF806020.1 |
| 21 | <i>Crotaphytus collaris</i>        | JF806021.1 |
| 22 | <i>Enyalioides heterolepis</i>     | EU586759.1 |
| 23 | <i>Enyalioides heterolepis</i>     | EU586768.1 |
| 24 | <i>Enyalioides heterolepis</i>     | EU586760.1 |
| 25 | <i>Enyalioides laticeps</i>        | EU586761.1 |
| 26 | <i>Enyalioides laticeps</i>        | EU586762.1 |
| 27 | <i>Enyalioides microlepis</i>      | EU586763.1 |
| 28 | <i>Enyalioides oshaughnessyi</i>   | EU586764.1 |
| 29 | <i>Enyalioides palpebralis</i>     | EU586765.1 |
| 30 | <i>Enyalioides praestabilis</i>    | EU586766.1 |
| 31 | <i>Enyalioides sp.</i>             | EU586767.1 |
| 32 | <i>Hoplocercus spinosus</i>        | EU586769.1 |
| 33 | <i>Leiocephalus barahonensis</i>   | HQ876223.1 |
| 34 | <i>Leiosaurus catamarcensis</i>    | JF806022.1 |
| 35 | <i>Liolaemus bellii</i>            | HQ876220.1 |
| 36 | <i>Morunasaurus annularis</i>      | HQ876218.1 |
| 37 | <i>Petrosaurus mearnsi</i>         | JN648396.1 |
| 38 | <i>Petrosaurus mearnsi</i>         | HQ876221.1 |
| 39 | <i>Petrosaurus repens</i>          | JN648397.1 |
| 40 | <i>Phrynosoma coronatum</i>        | JN648400.1 |
| 41 | <i>Phrynosoma platyrhinos</i>      | JF806023.1 |
| 42 | <i>Phymaturus palluma</i>          | JF806024.1 |
| 43 | <i>Polychrus marmoratus</i>        | HQ876222.1 |
| 44 | <i>Pristidactylus</i>              | JF806025.1 |
| 45 | <i>Sauromalus ater</i>             | JF806026.1 |
| 46 | <i>Sceloporus consobrinus</i>      | GQ494863.1 |
| 47 | <i>Sceloporus consobrinus</i>      | GQ494861.1 |
| 48 | <i>Sceloporus consobrinus</i>      | GQ494856.1 |
| 49 | <i>Sceloporus cowlesi</i>          | GQ494859.1 |
| 50 | <i>Sceloporus cowlesi</i>          | GQ494857.1 |
| 51 | <i>Sceloporus hunsakeri</i>        | JN648399.1 |
| 52 | <i>Sceloporus tristichus</i>       | GQ494855.1 |
| 53 | <i>Sceloporus tristichus</i>       | GQ494853.1 |
| 54 | <i>Sceloporus undulatus</i>        | GQ494867.1 |
| 55 | <i>Sceloporus undulatus</i>        | GQ494865.1 |
| 56 | <i>Sceloporus undulatus</i>        | GQ494866.1 |
| 57 | <i>Sceloporus variabilis</i>       | JF806027.1 |
| 58 | <i>Stenocercus guentheri</i>       | HQ876224.1 |
| 59 | <i>Tropidurus plica</i>            | JF806028.1 |
| 60 | <i>Uma scoparia brain-derived</i>  | JF806029.1 |
| 61 | <i>Uranoscodon superciliosus</i>   | JF806030.1 |
| 62 | <i>Urosaurus bicarinatus</i>       | JN648384.1 |
| 63 | <i>Urosaurus clarionensis</i>      | JN648382.1 |
| 64 | <i>Urosaurus gadovi</i>            | JN648391.1 |
| 65 | <i>Urosaurus graciosus</i>         | JN648393.1 |
| 66 | <i>Urosaurus graciosus</i>         | JN648392.1 |
| 67 | <i>Urosaurus lahtelai</i>          | JN648385.1 |

|    |                                 |            |
|----|---------------------------------|------------|
| 36 | <i>Anniella pulchra</i>         | EU445881.1 |
| 37 | <i>Anniella pulchra</i>         | EU445882.1 |
| 38 | <i>Anniella pulchra</i>         | EU445883.1 |
| 39 | <i>Anniella pulchra</i>         | EU445884.1 |
| 40 | <i>Anniella pulchra</i>         | EU445885.1 |
| 41 | <i>Anniella pulchra</i>         | EU445886.1 |
| 42 | <i>Anniella pulchra</i>         | EU445887.1 |
| 43 | <i>Anniella pulchra</i>         | EU445888.1 |
| 44 | <i>Anniella pulchra</i>         | EU445889.1 |
| 45 | <i>Anniella pulchra</i>         | EU445890.1 |
| 46 | <i>Anniella pulchra</i>         | EU445891.1 |
| 47 | <i>Anniella pulchra</i>         | EU445892.1 |
| 48 | <i>Anniella pulchra</i>         | EU445893.1 |
| 49 | <i>Anniella pulchra</i>         | EU445894.1 |
| 50 | <i>Anniella pulchra</i>         | EU445895.1 |
| 51 | <i>Anniella pulchra</i>         | EU445896.1 |
| 52 | <i>Anniella pulchra</i>         | EU445897.1 |
| 53 | <i>Anniella pulchra</i>         | EU445898.1 |
| 54 | <i>Anniella pulchra</i>         | EU445899.1 |
| 55 | <i>Anniella pulchra</i>         | EU445900.1 |
| 56 | <i>Anniella pulchra</i>         | EU445901.1 |
| 57 | <i>Anniella pulchra</i>         | EU445902.1 |
| 58 | <i>Anniella pulchra</i>         | EU445903.1 |
| 59 | <i>Anniella pulchra</i>         | EU445904.1 |
| 60 | <i>Anniella pulchra</i>         | EU445905.1 |
| 61 | <i>Anniella pulchra</i>         | EU445906.1 |
| 62 | <i>Anniella pulchra</i>         | HM160579.1 |
| 63 | <i>Celestus enneagrammus</i>    | GU457853.1 |
| 64 | <i>Elgaria multicarinata</i>    | GU457854.1 |
| 65 | <i>Heloderma horridum</i>       | GU457855.1 |
| 66 | <i>Heloderma suspectum</i>      | FJ433955.1 |
| 67 | <i>Heloderma suspectum</i>      | GU457856.1 |
| 68 | <i>Lanthanotus borneensis</i>   | GU457859.1 |
| 69 | <i>Pseudopus apodus</i>         | GU457851.1 |
| 70 | <i>Shinisaurus crocodilurus</i> | GU457857.1 |
| 71 | <i>Varanus acanthurus</i>       | GU457860.1 |
| 72 | <i>Varanus exanthematicus</i>   | GU457861.1 |
| 73 | <i>Varanus salvator voucher</i> | EU402618.1 |
| 74 | <i>Xenosaurus grandis</i>       | GU457858.1 |
| 75 | <i>Xenosaurus platyceps</i>     | EU402617.1 |

### Crocodyles

### Accession

|    |                                   |            |
|----|-----------------------------------|------------|
| 1  | <i>Alligator mississippiensis</i> | AF416631.1 |
| 2  | <i>Alligator mississippiensis</i> | EU275888.1 |
| 3  | <i>Alligator mississippiensis</i> | EU737934.1 |
| 4  | <i>Alligator mississippiensis</i> | JN654788.1 |
| 5  | <i>Alligator sinensis</i>         | EF646303.1 |
| 6  | <i>Caiman crocodilus</i>          | EF646297.1 |
| 7  | <i>Caiman latirostris</i>         | EF646298.1 |
| 8  | <i>Caiman yacare</i>              | EF646299.1 |
| 9  | <i>Crocodylus acutus</i>          | EF646305.1 |
| 10 | <i>Crocodylus intermedius</i>     | EF646306.1 |

|    |                                |            |    |                                |            |
|----|--------------------------------|------------|----|--------------------------------|------------|
| 68 | <i>Urosaurus microscutatus</i> | JN648386.1 | 11 | <i>Crocodylus johnsoni</i>     | EF646309.1 |
| 69 | <i>Urosaurus ornatus</i>       | JN648389.1 | 12 | <i>Crocodylus mindorensis</i>  | EF646310.1 |
| 70 | <i>Urosaurus ornatus</i>       | JN648390.1 | 13 | <i>Crocodylus moreletii</i>    | EF646307.1 |
| 71 | <i>Urostrophus vaultieri</i>   | HQ876219.1 | 14 | <i>Crocodylus niloticus</i>    | EF646314.1 |
| 72 | <i>Uta squamata</i>            | JN648394.1 | 15 | <i>Crocodylus niloticus</i>    | JQ073126.1 |
| 73 | <i>Uta stansburiana</i>        | JN648395.1 | 16 | <i>Crocodylus niloticus</i>    | JQ073127.1 |
| 74 | <i>Uta stansburiana</i>        | JF806031.1 | 17 | <i>Crocodylus novaeguineae</i> | EF646311.1 |

| <b>Turtles</b> | <b>Accession</b>                     |            |
|----------------|--------------------------------------|------------|
| 1              | <i>Batagur trivittata</i>            | GU085546.1 |
| 2              | <i>Caretta caretta</i>               | FJ009029.1 |
| 3              | <i>Caretta caretta</i>               | FJ009022.1 |
| 4              | <i>Carettochelys insculpta</i>       | GU085547.1 |
| 5              | <i>Chelonia mydas</i>                | GU085548.1 |
| 6              | <i>Chelonia mydas</i>                | FJ039950.1 |
| 7              | <i>Chelonia mydas</i>                | FJ039936.1 |
| 8              | <i>Chelonia mydas</i>                | FJ039943.1 |
| 9              | <i>Chelonia mydas</i>                | FJ039929.1 |
| 10             | <i>Chelonia mydas</i>                | FJ039922.1 |
| 11             | <i>Chelydra serpentina</i>           | GU085550.1 |
| 12             | <i>Chelydra serpentina</i>           | FJ230854.1 |
| 13             | <i>Chinemys reevesi</i>              | EF646319.1 |
| 14             | <i>Chrysemys picta</i>               | GU085549.1 |
| 15             | <i>Dermochelys coriacea</i>          | GU085551.1 |
| 16             | <i>Dermochelys coriacea</i>          | FJ039915.1 |
| 17             | <i>Dermochelys coriacea</i>          | FJ039908.1 |
| 18             | <i>Dogania subplana</i>              | GU085552.1 |
| 19             | <i>Eretmochelys imbricata</i>        | FJ039965.1 |
| 20             | <i>Eretmochelys imbricata</i>        | FJ039972.1 |
| 21             | <i>Erymnochelys madagascariensis</i> | AY988078.1 |
| 22             | <i>Hydromedusa tectifera</i>         | AY988083.1 |
| 23             | <i>Kinosternon flavescens</i>        | GU085554.1 |
| 24             | <i>Lepidochelys kempii</i>           | FJ039993.1 |
| 25             | <i>Lepidochelys olivacea</i>         | FJ039979.1 |
| 26             | <i>Lepidochelys olivacea</i>         | FJ039986.1 |
| 27             | <i>Macrochelys temminckii</i>        | GU085557.1 |
| 28             | <i>Macrochelys temminckii</i>        | FJ230861.1 |
| 29             | <i>Manouria emys</i>                 | GU085555.1 |
| 30             | <i>Mauremys reevesii</i>             | GU085556.1 |
| 31             | <i>Natator depressa</i>              | FJ039957.1 |
| 32             | <i>Pelodiscus sinensis</i>           | GU085560.1 |
| 33             | <i>Pelodiscus sinensis</i>           | FJ230868.1 |
| 34             | <i>Pelomedusa subrufa</i>            | GU085561.1 |
| 35             | <i>Pelomedusa subrufa</i>            | FJ230875.1 |
| 36             | <i>Pelomedusa subrufa</i>            | AY988081.1 |
| 37             | <i>Peltocephalus dumeriliana</i>     | AY988080.1 |
| 38             | <i>Pelusios gabonensis</i>           | AY988082.1 |
| 39             | <i>Platysternon megacephalum</i>     | GU085558.1 |
| 40             | <i>Psammobates pardalis</i>          | GU085559.1 |
| 41             | <i>Staurotypus triporcatus</i>       | AY988084.1 |
| 42             | <i>Sternotherus odoratus</i>         | GU085563.1 |
| 43             | <i>Testudo graeca</i>                | GU085564.1 |

|    |                                |            |
|----|--------------------------------|------------|
| 18 | <i>Crocodylus palustris</i>    | EF646313.1 |
| 19 | <i>Crocodylus porosus</i>      | EF646312.1 |
| 20 | <i>Crocodylus porosus</i>      | JN654790.1 |
| 21 | <i>Crocodylus rhombifer</i>    | EF646304.1 |
| 22 | <i>Crocodylus siamensis</i>    | EF646308.1 |
| 23 | <i>Gavialis gangeticus</i>     | EF646318.1 |
| 24 | <i>Gavialis gangeticus</i>     | EU737935.1 |
| 25 | <i>Mecistops cataphractus</i>  | EF646315.1 |
| 26 | <i>Melanosuchus niger</i>      | EF646300.1 |
| 27 | <i>Osteolaemus tetraspis</i>   | EF646316.1 |
| 28 | <i>Paleosuchus palpebrosus</i> | EF646301.1 |
| 29 | <i>Paleosuchus trigonatus</i>  | EF646302.1 |
| 30 | <i>Tomistoma schlegelii</i>    | EF646317.1 |

| <b>Mammals</b> | <b>Accession</b>              |                |
|----------------|-------------------------------|----------------|
| 1              | <i>Ailuropoda melanoleuca</i> | U56638.1       |
| 2              | <i>Ailurus fulgens</i>        | U56639.1       |
| 3              | <i>Bos taurus</i>             | NM_001046607.1 |
| 4              | <i>Bos taurus</i>             | X97914.1       |
| 5              | <i>Canis lupus</i>            | NM_001002975.1 |
| 6              | <i>Cavia porcellus</i>        | AB012097.1     |
| 7              | <i>Equus caballus</i>         | NM_001081787.1 |
| 8              | <i>Felis catus</i>            | NM_001009828.1 |
| 9              | <i>Helarctos malayanus</i>    | AF002240.1     |
| 10             | <i>Homo sapiens</i>           | AF400438.1     |
| 11             | <i>Homo sapiens</i>           | AY656701.1     |
| 12             | <i>Homo sapiens</i>           | M37762.1       |
| 13             | <i>Homo sapiens</i>           | X60201.1       |
| 14             | <i>Homo sapiens</i>           | M61176.1       |
| 15             | <i>Homo sapiens</i>           | BC029795.1     |
| 16             | <i>Homo sapiens</i>           | NM_001143808.1 |
| 17             | <i>Homo sapiens</i>           | AY054393.2     |
| 18             | <i>Homo sapiens</i>           | NM_001143805.1 |
| 19             | <i>Homo sapiens</i>           | AY054396.2     |
| 20             | <i>Homo sapiens</i>           | NM_001143809.1 |
| 21             | <i>Homo sapiens</i>           | AY054399.2     |
| 22             | <i>Homo sapiens</i>           | NM_001143812.1 |
| 23             | <i>Homo sapiens</i>           | EF689013.1     |
| 24             | <i>Homo sapiens</i>           | EF689017.1     |
| 25             | <i>Homo sapiens</i>           | AY054397.2     |
| 26             | <i>Homo sapiens</i>           | NM_001143807.1 |
| 27             | <i>Homo sapiens</i>           | AY054400.2     |
| 28             | <i>Homo sapiens</i>           | NM_170734.3    |
| 29             | <i>Homo sapiens</i>           | NM_001143813.1 |
| 30             | <i>Homo sapiens</i>           | AY054394.2     |



|    |                                  |            |    |                               |                |
|----|----------------------------------|------------|----|-------------------------------|----------------|
| 44 | <i>Trachemys scripta elegans</i> | HM055376.1 | 31 | <i>Homo sapiens</i>           | NM_170733.3    |
| 45 | <i>Trachemys scripta elegans</i> | HM055374.1 | 32 | <i>Homo sapiens</i>           | NM_001143806.1 |
| 46 | <i>Trachemys scripta elegans</i> | HM055372.1 | 33 | <i>Homo sapiens</i>           | NM_001143810.1 |
| 47 | <i>Trachemys scripta elegans</i> | HM055375.1 | 34 | <i>Homo sapiens</i>           | NM_170732.4    |
| 48 | <i>Trachemys scripta elegans</i> | HM055373.1 | 35 | <i>Homo sapiens</i>           | NM_001709.4    |
| 49 | <i>Trionyx triunguis</i>         | HQ012595.1 | 36 | <i>Homo sapiens</i>           | NM_001143811.1 |
| 50 | <i>Trionyx triunguis</i>         | HQ012593.1 | 37 | <i>Homo sapiens</i>           | AY054392.2     |
| 51 | <i>Trionyx triunguis</i>         | HQ012596.1 | 38 | <i>Homo sapiens</i>           | NM_170731.4    |
| 52 | <i>Trionyx triunguis</i>         | HQ012594.1 | 39 | <i>Homo sapiens</i>           | NM_001143816.1 |
| 53 | <i>Trionyx triunguis</i>         | HQ012592.1 | 40 | <i>Homo sapiens</i>           | EF689010.1     |
|    |                                  |            | 41 | <i>Homo sapiens</i>           | NM_170735.5    |
|    |                                  |            | 42 | <i>Homo sapiens</i>           | EF689009.1     |
|    |                                  |            | 43 | <i>Lipotes vexillifer</i>     | AY700119.1     |
|    |                                  |            | 44 | <i>Mesocricetus auratus</i>   | FJ645258.1     |
|    |                                  |            | 45 | <i>Mus musculus</i>           | AF459642.1     |
|    |                                  |            | 46 | <i>Mus musculus</i>           | X55573.1       |
|    |                                  |            | 47 | <i>Mus musculus</i>           | BC034862.1     |
|    |                                  |            | 48 | <i>Mus musculus</i>           | EF125682.1     |
|    |                                  |            | 49 | <i>Mus musculus</i>           | AY231132.1     |
|    |                                  |            | 50 | <i>Mus musculus</i>           | AY057912.1     |
|    |                                  |            | 51 | <i>Pan troglodytes</i>        | NM_001012441.1 |
|    |                                  |            | 52 | <i>Procyon lotor</i>          | AF003188.1     |
|    |                                  |            | 53 | <i>Rattus norvegicus</i>      | AY176065.1     |
|    |                                  |            | 54 | <i>Rattus norvegicus</i>      | M61175.1       |
|    |                                  |            | 55 | <i>Rattus norvegicus</i>      | M61178.1       |
|    |                                  |            | 56 | <i>Rattus norvegicus</i>      | BC087634.1     |
|    |                                  |            | 57 | <i>Rattus norvegicus</i>      | X67108.1       |
|    |                                  |            | 58 | <i>Rattus norvegicus</i>      | EF125687.1     |
|    |                                  |            | 59 | <i>Rattus norvegicus</i>      | EF125688.1     |
|    |                                  |            | 60 | <i>Selenarctos thibetanus</i> | DQ093584.1     |
|    |                                  |            | 61 | <i>Spermophilus citellus</i>  | AY646114.1     |
|    |                                  |            | 62 | <i>Sus scrofa</i>             | NM_214259.1    |
|    |                                  |            | 63 | <i>Ursus arctos</i>           | AF002239.1     |

## Supplementary File S5.3 Neurotrophin-3 (NT-3) sequence sets

| <b>Elapidae</b>           |                                | <b>Accession</b> |  | <b>Viperidae</b>    |                                      | <b>Accession</b> |  |
|---------------------------|--------------------------------|------------------|--|---------------------|--------------------------------------|------------------|--|
| 1                         | <i>Bungarus fasciatus</i>      | FJ434090.1       |  | 1                   | <i>Agkistrodon contortrix</i>        | JN703027.1       |  |
| 2                         | <i>Dendroaspis angusticeps</i> | FJ434089.1       |  | 2                   | <i>Azemiops feae</i>                 | EU390909.1       |  |
| 3                         | <i>Elapsoidea semiannulata</i> | FJ434088.1       |  | 3                   | <i>Bothriechis schlegelii</i>        | FJ434084.1       |  |
| 4                         | <i>Laticauda colubrina</i>     | EU390927.1       |  | 4                   | <i>Bothrops asper</i>                | EU390910.1       |  |
| 5                         | <i>Laticauda colubrina</i>     | FJ434091.1       |  | 5                   | <i>Bothrops atrox</i>                | DQ469792.1       |  |
| 6                         | <i>Micrurus fulvius</i>        | EU390929.1       |  | 6                   | <i>Causus defilippi</i>              | EU390913.1       |  |
| 7                         | <i>Micrurus surinamensis</i>   | FJ434092.1       |  | 7                   | <i>Crotalus tigris</i>               | GQ334665.1       |  |
| 8                         | <i>Naja kaouthia</i>           | EU390930.1       |  | 8                   | <i>Daboia russellii</i>              | EU390916.1       |  |
| 9                         | <i>Notechis scutatus</i>       | EU390932.1       |  | 9                   | <i>Lachesis muta</i>                 | EU390924.1       |  |
|                           |                                |                  |  | 10                  | <i>Sistrurus catenatus</i>           | GQ334686.1       |  |
| <b>'Non-front-fanged'</b> |                                | <b>Accession</b> |  | <b>Typhlopoidea</b> |                                      | <b>Accession</b> |  |
| 1                         | <i>Alsophis cantherigerus</i>  | FJ434100.1       |  | 1                   | <i>Acutotyphlops kunuaensis</i>      | GU902590.1       |  |
| 2                         | <i>Amastridium sapperi</i>     | GQ334663.1       |  | 2                   | <i>Acutotyphlops sp</i>              | GU902629.1       |  |
| 3                         | <i>Atractus elaps</i>          | GU353273.1       |  | 3                   | <i>Acutotyphlops subocularis</i>     | GU902589.1       |  |
| 4                         | <i>Atractus wagleri</i>        | GQ334664.1       |  | 4                   | <i>Afrottyphlops angolensis</i>      | GU902562.1       |  |
| 5                         | <i>Calamaria pavementata</i>   | FJ434106.1       |  | 5                   | <i>Afrottyphlops bibronii</i>        | GU902620.1       |  |
| 6                         | <i>Coluber constrictor</i>     | EU390914.1       |  | 6                   | <i>Afrottyphlops congestus</i>       | GU902618.1       |  |
| 7                         | <i>Cryophis hallbergi</i>      | GQ334666.1       |  | 7                   | <i>Afrottyphlops fornasinii</i>      | GU902617.1       |  |
| 8                         | <i>Cryophis hallbergi</i>      | GU353276.1       |  | 8                   | <i>Afrottyphlops lineolatus</i>      | GU902621.1       |  |
| 9                         | <i>Diadophis punctatus</i>     | EU390917.1       |  | 9                   | <i>Afrottyphlops punctatus</i>       | GU902567.1       |  |
| 10                        | <i>Diadophis punctatus</i>     | FJ434098.1       |  | 10                  | <i>Ramphotyphlops diversus</i>       | GU902582.1       |  |
| 11                        | <i>Diadophis punctatus</i>     | GU353272.1       |  | 11                  | <i>Ramphotyphlops endoterus</i>      | GU902570.1       |  |
| 12                        | <i>Dipsas catesbyi</i>         | GU353277.1       |  | 12                  | <i>Ramphotyphlops ganei</i>          | GU902583.1       |  |
| 13                        | <i>Dipsas pratti</i>           | GQ334667.1       |  | 13                  | <i>Ramphotyphlops guentheri</i>      | GU902575.1       |  |
| 14                        | <i>Grayia ornata</i>           | FJ434103.1       |  | 14                  | <i>Ramphotyphlops howi</i>           | GU902585.1       |  |
| 15                        | <i>Hapsidophrys smaragdina</i> | FJ434104.1       |  | 15                  | <i>Ramphotyphlops kimberleyensis</i> | GU902577.1       |  |
| 16                        | <i>Heterodon platirhinus</i>   | EU390921.1       |  | 16                  | <i>Ramphotyphlops ligatus</i>        | GU902576.1       |  |
| 17                        | <i>Heterodon platirhinus</i>   | GU353271.1       |  | 17                  | <i>Ramphotyphlops pinguis</i>        | GU902586.1       |  |
| 18                        | <i>Homalopsis buccata</i>      | EU390922.1       |  | 18                  | <i>Ramphotyphlops splendidus</i>     | GU902587.1       |  |
| 19                        | <i>Homalopsis buccata</i>      | FJ434087.1       |  | 19                  | <i>Ramphotyphlops troglodytes</i>    | GU902588.1       |  |
| 20                        | <i>Hypsiglena affinis</i>      | GU353278.1       |  | 20                  | <i>Megatyphlops mucroso</i>          | GU902560.1       |  |
| 21                        | <i>Hypsiglena chlorophaea</i>  | FJ455195.1       |  | 21                  | <i>Megatyphlops schlegelii</i>       | GU902619.1       |  |
| 22                        | <i>Hypsiglena chlorophaea</i>  | FJ455198.1       |  | 22                  | <i>Ramphotyphlops acuticauda</i>     | GU902554.1       |  |
| 23                        | <i>Hypsiglena jani</i>         | FJ455193.1       |  | 23                  | <i>Ramphotyphlops albiceps</i>       | GU902555.1       |  |
| 24                        | <i>Hypsiglena ochrorhyncha</i> | FJ455199.1       |  | 24                  | <i>Ramphotyphlops australis</i>      | GU902580.1       |  |
| 25                        | <i>Hypsiglena ochrorhyncha</i> | FJ455200.1       |  | 25                  | <i>Ramphotyphlops bicolor</i>        | GU902581.1       |  |
| 26                        | <i>Hypsiglena ochrorhyncha</i> | FJ455201.1       |  | 26                  | <i>Ramphotyphlops bituberculatus</i> | GU902574.1       |  |
| 27                        | <i>Hypsiglena ochrorhyncha</i> | FJ455202.1       |  | 27                  | <i>Ramphotyphlops braminus</i>       | GU902556.1       |  |
| 28                        | <i>Hypsiglena slevini</i>      | FJ455191.1       |  | 28                  | <i>Ramphotyphlops grypus</i>         | GU902584.1       |  |
| 29                        | <i>Hypsiglena sp.</i>          | FJ455194.1       |  | 29                  | <i>Ramphotyphlops lineatus</i>       | GU902557.1       |  |
| 30                        | <i>Hypsiglena torquata</i>     | FJ455192.1       |  | 30                  | <i>Ramphotyphlops longissimus</i>    | GU902579.1       |  |
| 31                        | <i>Imantodes cenchoa</i>       | EU390923.1       |  | 31                  | <i>Ramphotyphlops pilbarensis</i>    | GU902571.1       |  |
| 32                        | <i>Imantodes cenchoa</i>       | FJ455187.1       |  | 32                  | <i>Ramphotyphlops polygrammicus</i>  | GU902591.1       |  |
| 33                        | <i>Imantodes cenchoa</i>       | GQ334668.1       |  | 33                  | <i>Ramphotyphlops unguirostris</i>   | GU902578.1       |  |
| 34                        | <i>Imantodes cenchoa</i>       | GQ334669.1       |  | 34                  | <i>Ramphotyphlops waitii</i>         | GU902573.1       |  |
| 35                        | <i>Imantodes inornatus</i>     | GU353279.1       |  | 35                  | <i>Rhinotyphlops feae</i>            | GU902558.1       |  |
| 36                        | <i>Lampropeltis getula</i>     | EU390925.1       |  | 36                  | <i>Rhinotyphlops lalandei</i>        | GU902559.1       |  |
| 37                        | <i>Lamprophis fuliginosus</i>  | EU390926.1       |  | 37                  | <i>Rhinotyphlops newtoni</i>         | GU902561.1       |  |

|    |                                       |            |    |                                |            |
|----|---------------------------------------|------------|----|--------------------------------|------------|
| 38 | <i>Lamprophis fuliginosus</i>         | FJ434094.1 | 38 | <i>Typhlops agoralionis</i>    | GU902592.1 |
| 39 | <i>Leioheterodon madagascariensis</i> | FJ434093.1 | 39 | <i>Typhlops anchaurus</i>      | GU902593.1 |
| 40 | <i>Leptodeira annulata</i>            | FJ434099.1 | 40 | <i>Typhlops anousius</i>       | GU902615.1 |
| 41 | <i>Leptodeira annulata</i>            | GQ334670.1 | 41 | <i>Typhlops arator</i>         | GU902594.1 |
| 42 | <i>Leptodeira annulata</i>            | GQ334671.1 | 42 | <i>Typhlops arenarius</i>      | GU902624.1 |
| 43 | <i>Leptodeira annulata</i>            | GQ334672.1 | 43 | <i>Typhlops brongersmianus</i> | GU902563.1 |
| 44 | <i>Leptodeira bakeri</i>              | GQ334673.1 | 44 | <i>Typhlops capitulatus</i>    | GU902595.1 |
| 45 | <i>Leptodeira frenata</i>             | FJ810242.1 | 45 | <i>Typhlops catapontus</i>     | GU902596.1 |
| 46 | <i>Leptodeira maculata</i>            | GQ334674.1 | 46 | <i>Typhlops caymanensis</i>    | GU902597.1 |
| 47 | <i>Leptodeira nigrofasciata</i>       | GQ334681.1 | 47 | <i>Typhlops contorhinus</i>    | GU902616.1 |
| 48 | <i>Leptodeira punctata</i>            | GQ334682.1 | 48 | <i>Typhlops dominicanus</i>    | GU902598.1 |
| 49 | <i>Leptodeira septentrionalis</i>     | FJ455188.1 | 49 | <i>Typhlops elegans</i>        | GU902564.1 |
| 50 | <i>Leptodeira septentrionalis</i>     | GQ334676.1 | 50 | <i>Typhlops eperopeus</i>      | GU902614.1 |
| 51 | <i>Leptodeira septentrionalis</i>     | GQ334677.1 | 51 | <i>Typhlops geotomus</i>       | GU902599.1 |
| 52 | <i>Leptodeira septentrionalis</i>     | GQ334678.1 | 52 | <i>Typhlops granti</i>         | GU902600.1 |
| 53 | <i>Leptodeira septentrionalis</i>     | GQ334675.1 | 53 | <i>Typhlops hedraeus</i>       | GU902565.1 |
| 54 | <i>Leptodeira septentrionalis</i>     | GQ334679.1 | 54 | <i>Typhlops hypomethes</i>     | GU902601.1 |
| 55 | <i>Leptodeira splendida</i>           | GQ334680.1 | 55 | <i>Typhlops jamaicensis</i>    | GU902602.1 |
| 56 | <i>Liophis lineatus</i>               | DQ469793.1 | 56 | <i>Typhlops lumbricalis</i>    | GU902603.1 |
| 57 | <i>Lycophidion capense</i>            | JN703031.1 | 57 | <i>Typhlops mirus</i>          | GU902566.1 |
| 58 | <i>Mehelya capensis</i>               | FJ434096.1 | 58 | <i>Typhlops monastus</i>       | GU902604.1 |
| 59 | <i>Natrix natrix</i>                  | EU390931.1 | 59 | <i>Typhlops naugus</i>         | GU902605.1 |
| 60 | <i>Ninia atrata</i>                   | GQ334683.1 | 60 | <i>Typhlops notorachius</i>    | GU902606.1 |
| 61 | <i>Oxyrhopus petola</i>               | GQ334684.1 | 61 | <i>Typhlops pammece</i>        | GU902628.1 |
| 62 | <i>Pareas hamptoni</i>                | EU390933.1 | 62 | <i>Typhlops platycephalus</i>  | GU902607.1 |
| 63 | <i>Phyllorhynchus decurtatus</i>      | FJ434105.1 | 63 | <i>Typhlops reticulatus</i>    | GU902568.1 |
| 64 | <i>Psammophylax variabilis</i>        | FJ434097.1 | 64 | <i>Typhlops richardi</i>       | GU902608.1 |
| 65 | <i>Pseudoleptodeira latifasciata</i>  | FJ455190.1 | 65 | <i>Typhlops rostellatus</i>    | GU902609.1 |
| 66 | <i>Pseudoxenodon bambusicola</i>      | FJ434101.1 | 66 | <i>Typhlops schwartzi</i>      | GU902610.1 |
| 67 | <i>Rhadinaea fulvivittis</i>          | GU353275.1 | 67 | <i>Typhlops sp</i>             | GU902630.1 |
| 68 | <i>Sibon nebulatus</i>                | FJ455189.1 | 68 | <i>Typhlops sulcatus</i>       | GU902611.1 |
| 69 | <i>Sibon nebulatus</i>                | GQ334685.1 | 69 | <i>Typhlops sylleptor</i>      | GU902612.1 |
| 70 | <i>Thamnophis marcianus</i>           | EU390935.1 | 70 | <i>Typhlops syntherus</i>      | GU902613.1 |
| 71 | <i>Trachyboa boulengeri</i>           | EU390936.1 | 71 | <i>Typhlops vermicularis</i>   | GU902569.1 |
| 72 | <i>Trimorphodon biscutatus</i>        | EU390937.1 | 72 | <i>Xenotyphlops grandidier</i> | GU902627.2 |
| 73 | <i>Xenochrophis flavipunctatus</i>    | FJ434102.1 | 73 | <i>Xenotyphlops sp</i>         | GU902626.2 |
| 74 | <i>Xenochrophis piscator</i>          | EU390941.1 |    |                                |            |

| <b>Boidae</b> |                                     | <b>Accession</b> | <b>Anguimorpha</b> |                               | <b>Accession</b> |
|---------------|-------------------------------------|------------------|--------------------|-------------------------------|------------------|
| 1             | <i>Acrantophis dumerili</i>         | AY988049.1       | 1                  | <i>Abronia graminea</i>       | JQ844947.1       |
| 2             | <i>Apodora papuana</i>              | FJ434076.1       | 2                  | <i>Anguis fragilis</i>        | JQ844948.1       |
| 3             | <i>Boa constrictor</i>              | AY988047.1       | 3                  | <i>Anniella pulchra</i>       | GU456008.1       |
| 4             | <i>Boa constrictor occidentalis</i> | HQ399534.1       | 4                  | <i>Barisia imbricata</i>      | JQ844944.1       |
| 5             | <i>Calabaria reinhardtii</i>        | AY988058.1       | 5                  | <i>Celestus enneagrammus</i>  | GU456009.1       |
| 6             | <i>Calabaria reinhardtii</i>        | EU390911.1       | 6                  | <i>Diploglossus delasagra</i> | JQ844945.1       |
| 7             | <i>Candoia carinata</i>             | AY988048.1       | 7                  | <i>Elgaria coerulea</i>       | JQ844949.1       |
| 8             | <i>Candoia carinata</i>             | FJ434077.1       | 8                  | <i>Elgaria multicarinata</i>  | GU456010.1       |
| 9             | <i>Charina bottae</i>               | AY988059.1       | 9                  | <i>Gerrhonotus infernalis</i> | JQ844950.1       |
| 10            | <i>Charina trivirgata</i>           | DQ465578.1       | 10                 | <i>Heloderma horridum</i>     | GU456011.1       |
| 11            | <i>Corallus caninus</i>             | AY988044.1       | 11                 | <i>Heloderma suspectum</i>    | FJ434061.1       |
| 12            | <i>Corallus hortulanus</i>          | HQ399535.1       | 12                 | <i>Heloderma suspectum</i>    | GU456012.1       |
| 13            | <i>Epicrates alvarezi</i>           | HQ399531.1       | 13                 | <i>Lanthanotus borneensis</i> | GU456015.1       |

|    |                                  |            |
|----|----------------------------------|------------|
| 14 | <i>Epicrates angulifer</i>       | HQ399533.1 |
| 15 | <i>Epicrates assisi</i>          | HQ399529.1 |
| 16 | <i>Epicrates cenchria</i>        | AY988045.1 |
| 17 | <i>Epicrates cenchria</i>        | HQ399528.1 |
| 18 | <i>Epicrates chrysogaster</i>    | JF812171.1 |
| 19 | <i>Epicrates chrysogaster</i>    | JF812172.1 |
| 20 | <i>Epicrates striatus</i>        | DQ465554.1 |
| 21 | <i>Eryx colubrinus</i>           | DQ465569.1 |
| 22 | <i>Eryx colubrinus</i>           | EU390919.1 |
| 23 | <i>Eryx conicus</i>              | AY988057.1 |
| 24 | <i>Eunectes murinus</i>          | HQ399527.1 |
| 25 | <i>Eunectes notaeus</i>          | AY988046.1 |
| 26 | <i>Eunectes notaeus</i>          | HQ399526.1 |
| 27 | <i>Sanzinia madagascariensis</i> | AY988050.1 |

|   | <b>Pythonidae</b>               | <b>Accession</b> |
|---|---------------------------------|------------------|
| 1 | <i>Aspidites melanocephalus</i> | DQ465558.1       |
| 2 | <i>Aspidites melanocephalus</i> | EU390908.1       |
| 3 | <i>Morelia spilota</i>          | AY988052.1       |
| 4 | <i>Python reticulatus</i>       | FJ434074.1       |
| 5 | <i>Liasis savuensis</i>         | FJ434075.1       |

|    | <b>Iguania</b>                     | <b>Accession</b> |
|----|------------------------------------|------------------|
| 1  | <i>Anolis carolinensis</i>         | EU390900.1       |
| 2  | <i>Anolis carolinensis</i>         | XM_003221366.1   |
| 3  | <i>Basiliscus plumifrons</i>       | AY987998.1       |
| 4  | <i>Brachylophus fasciatus</i>      | AY988009.1       |
| 5  | <i>Brachylophus fasciatus</i>      | JF804533.1       |
| 6  | <i>Chalarodon madagascariensis</i> | AY988001.1       |
| 7  | <i>Chalarodon madagascariensis</i> | JF804536.1       |
| 8  | <i>Conolophus pallidus</i>         | HM352521.1       |
| 9  | <i>Conolophus subcristatus</i>     | HM352522.1       |
| 10 | <i>Crotaphytus collaris</i>        | AY987997.1       |
| 11 | <i>Crotaphytus collaris</i>        | JF804542.1       |
| 12 | <i>Cyclura carinata</i>            | HM352524.1       |
| 13 | <i>Cyclura nubila</i>              | FJ434062.1       |
| 14 | <i>Cyclura pinguis</i>             | GQ853278.1       |
| 15 | <i>Cyclura ricordi</i>             | HM352523.1       |
| 16 | <i>Dipsosaurus dorsalis</i>        | JF804545.1       |
| 17 | <i>Enyalioides laticeps</i>        | GU456004.1       |
| 18 | <i>Gambelia wislizenii</i>         | EU108024.1       |
| 19 | <i>Gambelia wislizenii</i>         | JF804548.1       |
| 20 | <i>Iguana iguana</i>               | HM352529.1       |
| 21 | <i>Iguana iguana</i>               | HM352530.1       |
| 22 | <i>Leiocephalus barahonensis</i>   | JF804551.1       |
| 23 | <i>Leiosaurus catamarcensis</i>    | JF804553.1       |
| 24 | <i>Liolaemus bellii</i>            | JF804554.1       |
| 25 | <i>Liolaemus elongatus</i>         | JN703030.1       |
| 26 | <i>Liolaemus pictus</i>            | AY988003.1       |
| 27 | <i>Morunasaurus annularis</i>      | JF804556.1       |
| 28 | <i>Oplurus cuvieri</i>             | AY988000.1       |

|    |                                 |            |
|----|---------------------------------|------------|
| 14 | <i>Pseudopus apodus</i>         | GU456007.1 |
| 15 | <i>Pseudopus apodus</i>         | JQ844946.1 |
| 16 | <i>Shinisaurus crocodilurus</i> | GU456013.1 |
| 17 | <i>Shinisaurus crocodilurus</i> | JQ844951.1 |
| 18 | <i>Varanus acanthurus</i>       | GU456016.1 |
| 19 | <i>Varanus acanthurus</i>       | JQ844905.1 |
| 20 | <i>Varanus albigularis</i>      | JQ844940.1 |
| 21 | <i>Varanus baritji</i>          | JQ844906.1 |
| 22 | <i>Varanus brevicauda</i>       | JQ844907.1 |
| 23 | <i>Varanus bushi</i>            | JQ844908.1 |
| 24 | <i>Varanus caudolineatus</i>    | JQ844909.1 |
| 25 | <i>Varanus doreanus</i>         | JQ844941.1 |
| 26 | <i>Varanus dumerilii</i>        | JQ844942.1 |
| 27 | <i>Varanus eremius</i>          | JQ844910.1 |
| 28 | <i>Varanus exanthematicus</i>   | GU456017.1 |
| 29 | <i>Varanus exanthematicus</i>   | JQ844911.1 |
| 30 | <i>Varanus giganteus</i>        | JQ844912.1 |
| 31 | <i>Varanus gilleni</i>          | JQ844913.1 |
| 32 | <i>Varanus glauerti</i>         | JQ844914.1 |
| 33 | <i>Varanus glebopalma</i>       | JQ844915.1 |
| 34 | <i>Varanus gouldii</i>          | JQ844916.1 |
| 35 | <i>Varanus indicus</i>          | JQ844917.1 |
| 36 | <i>Varanus jobiensis</i>        | JQ844938.1 |
| 37 | <i>Varanus keithhornei</i>      | JQ844918.1 |
| 38 | <i>Varanus kingorum</i>         | JQ844919.1 |
| 39 | <i>Varanus komodoensis</i>      | JQ844920.1 |
| 40 | <i>Varanus mertensi</i>         | JQ844921.1 |
| 41 | <i>Varanus mitchelli</i>        | JQ844922.1 |
| 42 | <i>Varanus niloticus</i>        | JQ844923.1 |
| 43 | <i>Varanus panoptes</i>         | JQ844924.1 |
| 44 | <i>Varanus panoptes</i>         | JQ844925.1 |
| 45 | <i>Varanus pilbarensis</i>      | JQ844926.1 |
| 46 | <i>Varanus prasinus</i>         | JQ844927.1 |
| 47 | <i>Varanus primordius</i>       | JQ844928.1 |
| 48 | <i>Varanus rosenbergi</i>       | JQ844929.1 |
| 49 | <i>Varanus rudicollis</i>       | JQ844943.1 |
| 50 | <i>Varanus salvadorii</i>       | JQ844930.1 |
| 51 | <i>Varanus salvator</i>         | EU390902.1 |
| 52 | <i>Varanus salvator</i>         | JQ844931.1 |
| 53 | <i>Varanus scalaris</i>         | JQ844932.1 |
| 54 | <i>Varanus semiremex</i>        | JQ844933.1 |
| 55 | <i>Varanus spenceri</i>         | JQ844934.1 |
| 56 | <i>Varanus storri</i>           | JQ844935.1 |
| 57 | <i>Varanus timorensis</i>       | JQ844936.1 |
| 58 | <i>Varanus tristis</i>          | JQ844937.1 |
| 59 | <i>Varanus varius</i>           | JQ844939.1 |
| 60 | <i>Xenosaurus grandis</i>       | GU456014.1 |
| 61 | <i>Xenosaurus platyceps</i>     | EU390901.1 |

|    |                                  |            |
|----|----------------------------------|------------|
| 29 | <i>Oplurus cyclurus</i>          | GU456006.1 |
| 30 | <i>Petrosaurus mearnsi</i>       | JF804557.1 |
| 31 | <i>Phrynosoma cornutum</i>       | AY988004.1 |
| 32 | <i>Phrynosoma platyrhinos</i>    | JF804559.1 |
| 33 | <i>Phymaturus calcogaster</i>    | JX969565.1 |
| 34 | <i>Phymaturus ceii</i>           | JX969566.1 |
| 35 | <i>Phymaturus delheyi</i>        | JX969582.1 |
| 36 | <i>Phymaturus dorsimaculatus</i> | JX969596.1 |
| 37 | <i>Phymaturus etheridgei</i>     | JX969564.1 |
| 38 | <i>Phymaturus excelsus</i>       | JX969567.1 |
| 39 | <i>Phymaturus extrilidus</i>     | JX969605.1 |
| 40 | <i>Phymaturus felixi</i>         | JX969578.1 |
| 41 | <i>Phymaturus felixi</i>         | JX969579.1 |
| 42 | <i>Phymaturus indistinctus</i>   | JX969568.1 |
| 43 | <i>Phymaturus laurenti</i>       | JX969595.1 |
| 44 | <i>Phymaturus mallimaccii</i>    | JX969597.1 |
| 45 | <i>Phymaturus manuelae</i>       | JX969569.1 |
| 46 | <i>Phymaturus nevadoi</i>        | JX969570.1 |
| 47 | <i>Phymaturus palluma</i>        | JF804560.1 |
| 48 | <i>Phymaturus palluma</i>        | JX969598.1 |
| 49 | <i>Phymaturus patagonicus</i>    | JX969571.1 |
| 50 | <i>Phymaturus payunia</i>        | JX969572.1 |
| 51 | <i>Phymaturus punae</i>          | JX969599.1 |
| 52 | <i>Phymaturus querque</i>        | JX969604.1 |
| 53 | <i>Phymaturus roigorum</i>       | JX969600.1 |
| 54 | <i>Phymaturus sitesi</i>         | JX969584.1 |
| 55 | <i>Phymaturus somuncurensis</i>  | JX969573.1 |
| 56 | <i>Phymaturus sp.</i>            | JX969614.1 |
| 57 | <i>Phymaturus spectabilis</i>    | JX969574.1 |
| 58 | <i>Phymaturus spurcus</i>        | JX969575.1 |
| 59 | <i>Phymaturus tenebrosus</i>     | JX969576.1 |
| 60 | <i>Phymaturus verdugo</i>        | JX969601.1 |
| 61 | <i>Phymaturus vociferator</i>    | JX969602.1 |
| 62 | <i>Phymaturus zapalensis</i>     | JX969577.1 |
| 63 | <i>Polychrus marmoratus</i>      | JF804564.1 |
| 64 | <i>Pristidactylus torquatus</i>  | JF804565.1 |
| 65 | <i>Sauromalus ater</i>           | HM352525.1 |
| 66 | <i>Sauromalus ater</i>           | JF804568.1 |
| 67 | <i>Sauromalus australis</i>      | HM352526.1 |
| 68 | <i>Sceloporus horridus</i>       | AY988005.1 |
| 69 | <i>Sceloporus variabilis</i>     | JF804569.1 |
| 70 | <i>Stenocercus guentheri</i>     | JF804570.1 |
| 71 | <i>Tropidurus hispidus</i>       | AY987996.1 |
| 72 | <i>Uma scoparia</i>              | JF804574.1 |
| 73 | <i>Uranoscodon superciliosus</i> | JF804575.1 |
| 74 | <i>Urostrophus vautieri</i>      | JF804576.1 |
| 75 | <i>Uta stansburiana</i>          | JF804577.1 |

|    | <b>Crocodyles</b>                 | <b>Accession</b> |
|----|-----------------------------------|------------------|
| 1  | <i>Alligator mississippiensis</i> | AJ316234.1       |
| 2  | <i>Alligator sinensis</i>         | EF646331.1       |
| 3  | <i>Caiman crocodilus</i>          | EF646321.1       |
| 4  | <i>Caiman latirostris</i>         | EF646322.1       |
| 5  | <i>Caiman yacare</i>              | EF646323.1       |
| 6  | <i>Crocodylus acutus</i>          | EF646333.1       |
| 7  | <i>Crocodylus intermedius</i>     | EF646334.1       |
| 8  | <i>Crocodylus johnsoni</i>        | EF646325.1       |
| 9  | <i>Crocodylus mindorensis</i>     | EF646326.1       |
| 10 | <i>Crocodylus moreletii</i>       | EF646335.1       |
| 11 | <i>Crocodylus niloticus</i>       | EF646338.1       |
| 12 | <i>Crocodylus novaeguineae</i>    | EF646327.1       |
| 13 | <i>Crocodylus palustris</i>       | EF646337.1       |
| 14 | <i>Crocodylus porosus</i>         | EF646336.1       |
| 15 | <i>Crocodylus rhombifer</i>       | EF646332.1       |
| 16 | <i>Crocodylus siamensis</i>       | EF646324.1       |
| 17 | <i>Gavialis gangeticus</i>        | EF646342.1       |
| 18 | <i>Mecistops cataphractus</i>     | EF646339.1       |
| 19 | <i>Melanosuchus niger</i>         | EF646328.1       |
| 20 | <i>Osteolaemus tetraspis</i>      | EF646340.1       |
| 21 | <i>Paleosuchus palpebrosus</i>    | EF646329.1       |
| 22 | <i>Paleosuchus trigonatus</i>     | EF646330.1       |
| 23 | <i>Tomistoma schlegelii</i>       | EF646341.1       |

|    | <b>Mammals</b>                | <b>Accession</b> |
|----|-------------------------------|------------------|
| 1  | <i>Ailuropoda melanoleuca</i> | XM_002926828.1   |
| 2  | <i>Bos taurus</i>             | BC123576.1       |
| 3  | <i>Bos taurus</i>             | NM_001077988.2   |
| 4  | <i>Callithrix jacchus</i>     | XM_002752241.1   |
| 5  | <i>Canis lupus</i>            | XM_543858.3      |
| 6  | <i>Canis lupus</i>            | XM_003433475.1   |
| 7  | <i>Cavia porcellus</i>        | XM_003463303.1   |
| 8  | <i>Cricetulus griseus</i>     | XM_003496037.1   |
| 9  | <i>Equus caballus</i>         | XM_001495245.3   |
| 10 | <i>Felis catus</i>            | NM_001009367.1   |
| 11 | <i>Gorilla gorilla</i>        | XM_004052539.1   |
| 12 | <i>Gorilla gorilla</i>        | XM_004052540.1   |
| 13 | <i>Homo sapien</i>            | M37763.1         |
| 14 | <i>Homo sapien</i>            | M61180.1         |
| 15 | <i>Homo sapien</i>            | X53655.1         |
| 16 | <i>Homo sapien</i>            | BC069773.1       |
| 17 | <i>Homo sapien</i>            | CR541906.1       |
| 18 | <i>Homo sapien</i>            | BC107075.1       |
| 19 | <i>Homo sapien</i>            | NM_002527.4      |
| 20 | <i>Homo sapien</i>            | NM_001102654.1   |
| 21 | <i>Homo sapien</i>            | AK293895.1       |
| 22 | <i>Loxodonta africana</i>     | XM_003410779.1   |

|   | <b>Scinciformata</b>           | <b>Accession</b> |
|---|--------------------------------|------------------|
| 1 | <i>Acontias meleagris</i>      | GU456026.1       |
| 2 | <i>Amphiglossus splendidus</i> | JN568316.1       |
| 3 | <i>Brachymeles gracilis</i>    | JN568322.1       |

|    |                                |            |    |                              |                |
|----|--------------------------------|------------|----|------------------------------|----------------|
| 4  | <i>Cordylus namaquensis</i>    | AY988010.1 | 23 | <i>Macaca fuscata</i>        | AF222683.1     |
| 5  | <i>Eugongylus rufescens</i>    | JN568336.1 | 24 | <i>Macaca mulatta</i>        | XM_001118191.2 |
| 6  | <i>Feylinia polylepis</i>      | GU456027.1 | 25 | <i>Monodelphis domestica</i> | XM_001368543.2 |
| 7  | <i>Mabuya quinquetaeniata</i>  | EU108028.1 | 26 | <i>Mus musculus</i>          | X53257.1       |
| 8  | <i>Mabuya quinquetaeniata</i>  | JN568320.1 | 27 | <i>Mus musculus</i>          | BC065785.1     |
| 9  | <i>Plestiodon chinensis</i>    | EF646344.1 | 28 | <i>Mus musculus</i>          | AK132586.1     |
| 10 | <i>Plestiodon fasciatus</i>    | JF804547.1 | 29 | <i>Mus musculus</i>          | NM_008742.3    |
| 11 | <i>Plestiodon laticeps</i>     | EU108023.1 | 30 | <i>Mus musculus</i>          | NM_001164034.1 |
| 12 | <i>Scincus scincus</i>         | GU456028.1 | 31 | <i>Mus musculus</i>          | NM_001164035.1 |
| 13 | <i>Sphenomorphus simus</i>     | EU108031.1 | 32 | <i>Nomascus leucogenys</i>   | XM_003273711.1 |
| 14 | <i>Sphenomorphus solomonis</i> | JN568332.1 | 33 | <i>omascus leucogenys</i>    | XM_003273712.1 |
| 15 | <i>Tiliqua scincoides</i>      | JN568330.1 | 34 | <i>Ornithorhynchus</i>       | XM_001507068.1 |
|    |                                |            | 35 | <i>Oryctolagus cuniculus</i> | XM_002712831.1 |
|    |                                |            | 36 | <i>Ovis aries</i>            | XM_004006944.1 |
|    |                                |            | 37 | <i>Ovis aries</i>            | XM_004006945.1 |
|    |                                |            | 38 | <i>Pan paniscus</i>          | XM_003820329.1 |
|    |                                |            | 39 | <i>Pan troglodytes</i>       | XM_522331.3    |
|    |                                |            | 40 | <i>Papio anubis</i>          | XM_003905836.1 |
|    |                                |            | 41 | <i>Pongo abelii</i>          | XM_002822796.1 |
|    |                                |            | 42 | <i>Rattus norvegicus</i>     | M34643.1       |
|    |                                |            | 43 | <i>Rattus norvegicus</i>     | M33968.1       |
|    |                                |            | 44 | <i>Rattus norvegicus</i>     | M61179.1       |
|    |                                |            | 45 | <i>Rattus norvegicus</i>     | NM_031073.3    |
|    |                                |            | 46 | <i>Rattus norvegicus</i>     | NM_001270869.1 |
|    |                                |            | 47 | <i>Rattus norvegicus</i>     | NM_001270868.1 |
|    |                                |            | 48 | <i>Rattus norvegicus</i>     | NM_001270870.1 |
|    |                                |            | 49 | <i>Saimiri boliviensis</i>   | XM_003942177.1 |
|    |                                |            | 50 | <i>Sarcophilus harrisii</i>  | XM_003771238.1 |

  

|    | <b>Turtles</b>                       | <b>Accession</b> |
|----|--------------------------------------|------------------|
| 1  | <i>Chelydra serpentina</i>           | JN568325.1       |
| 2  | <i>Chinemys reevesi</i>              | EF646343.1       |
| 3  | <i>Erymnochelys madagascariensis</i> | AY988085.1       |
| 4  | <i>Hydromedusa tectifera</i>         | AY988090.1       |
| 5  | <i>Pelomedusa subrufa</i>            | AY988088.1       |
| 6  | <i>Peltocephalus dumeriliana</i>     | AY988087.1       |
| 7  | <i>Pelusios gabonensis</i>           | AY988089.1       |
| 8  | <i>Podocnemis erythrocephala</i>     | FM165607.1       |
| 9  | <i>Podocnemis expansa</i>            | AY988086.1       |
| 10 | <i>Podocnemis expansa</i>            | JN568331.1       |
| 11 | <i>Podocnemis lewyana</i>            | FM165605.1       |
| 12 | <i>Podocnemis sextuberculata</i>     | FM165608.1       |
| 13 | <i>Podocnemis unifilis</i>           | FM165606.1       |
| 14 | <i>Podocnemis vogli</i>              | FM165609.1       |
| 15 | <i>Staurotypus triporcatus</i>       | AY988091.1       |
