# Supplementary material for: Molecular Evolution of Vertebrate Neurotrophins: Co-Option of the Highly Conserved Nerve Growth Factor Gene into the Advanced Snake Venom Arsenalf
Source: PubMed Central journal article supplement (PMC3843689; doi:10.1371/journal.pone.0081827), 2013-11-29

### S3. Molecular phylogeny of Neurotrophin-3 (NT-3)

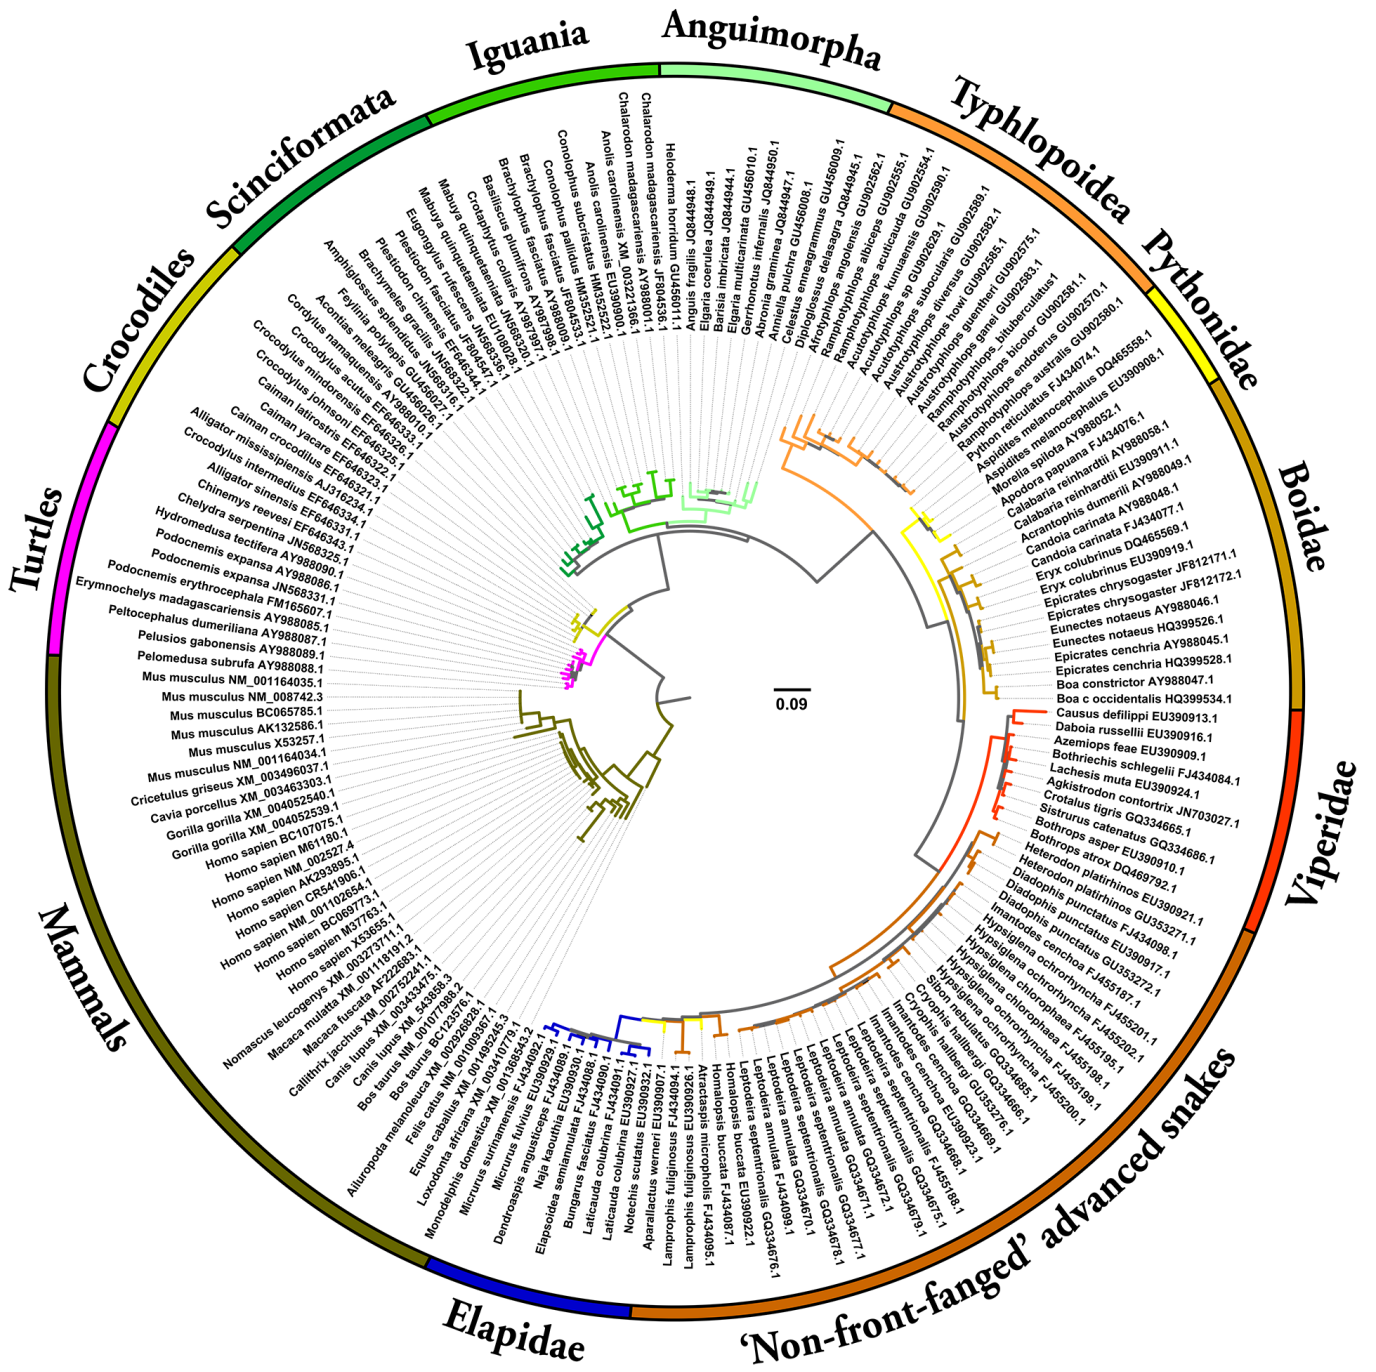

Supplement: pone.0081827.s008.pdf [file pone.0081827.s008.pdf]
