# Supplementary material for: Molecular Evolution of Vertebrate Neurotrophins: Co-Option of the Highly Conserved Nerve Growth Factor Gene into the Advanced Snake Venom Arsenalf
Source: PubMed Central journal article supplement (PMC3843689; doi:10.1371/journal.pone.0081827), 2013-11-29

# S4. Molecular phylogeny of Nerve Growth Factor (NGF), Brain-derived Neurotrophic factor and Neurotrophin-3 (NT-3) genes

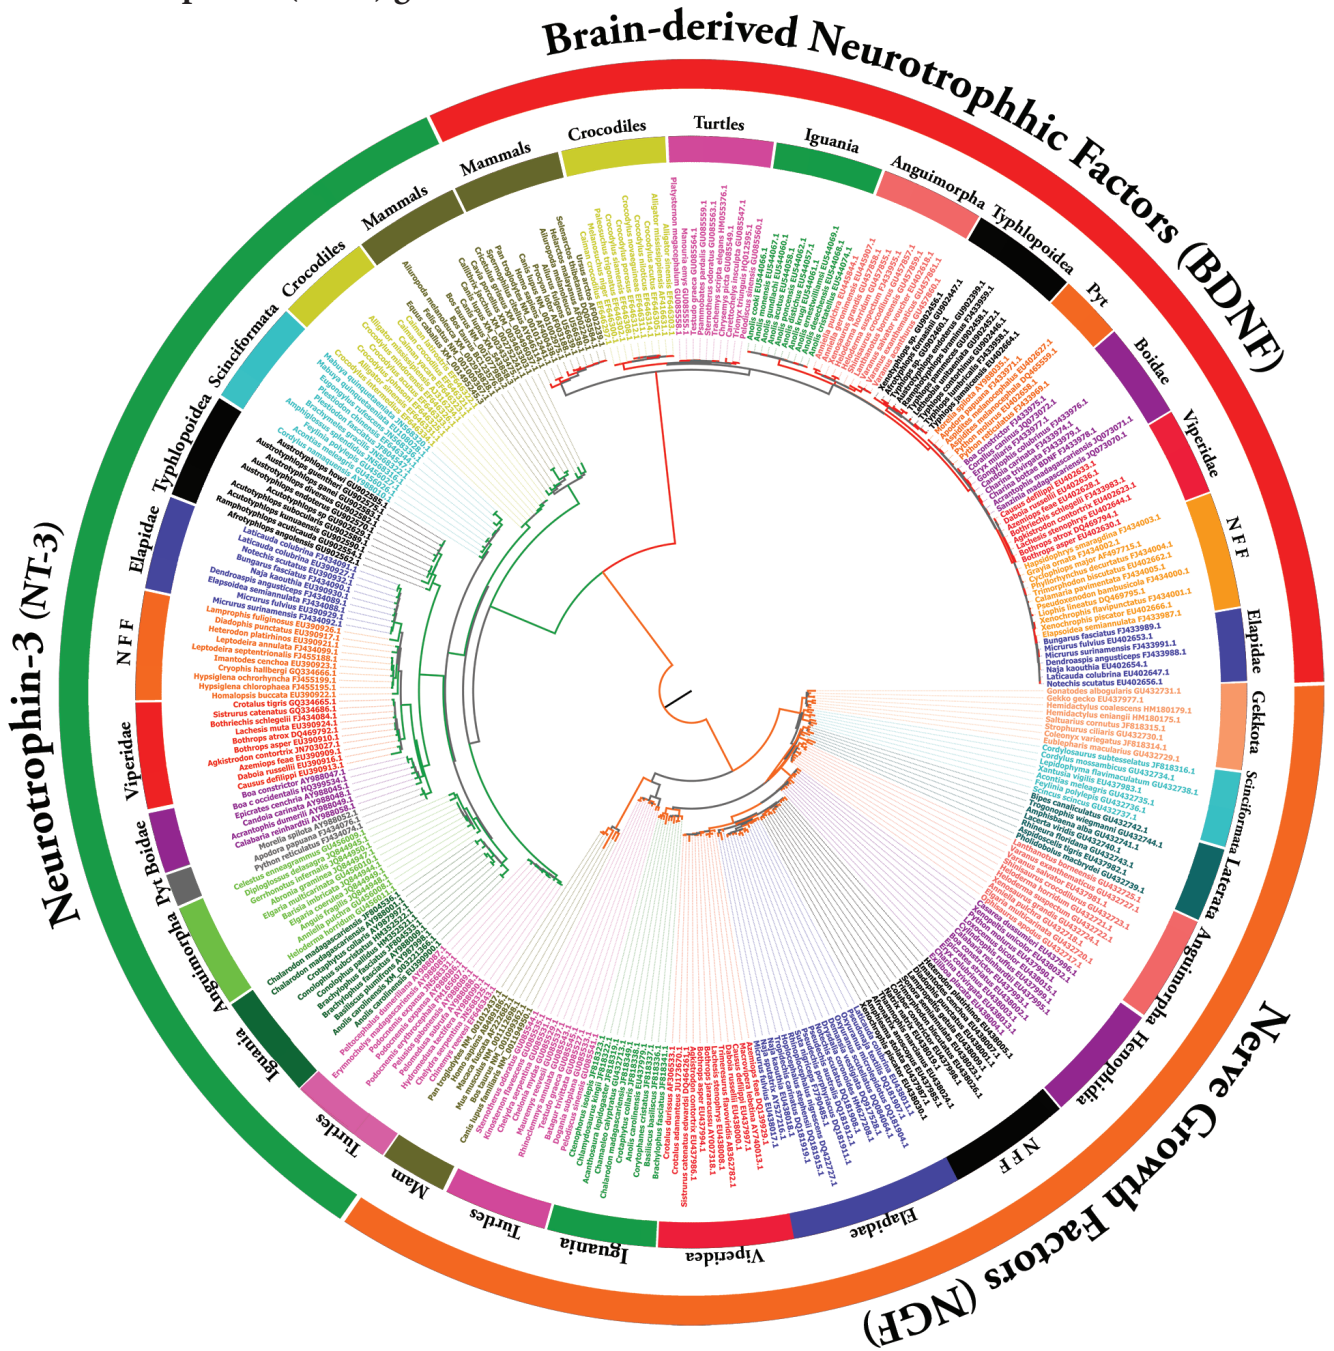

Supplement: pone.0081827.s009.pdf [file pone.0081827.s009.pdf]
