# Supplementary material for: Molecular Evolution of Vertebrate Neurotrophins: Co-Option of the Highly Conserved Nerve Growth Factor Gene into the Advanced Snake Venom Arsenalf
Source: PubMed Central journal article supplement (PMC3843689; doi:10.1371/journal.pone.0081827), 2013-11-29
Supplement: pone.0081827.s010.pdf [file pone.0081827.s010.pdf]

# S5. Alignment of vertebrate Nerve Growth Factors (NGF)

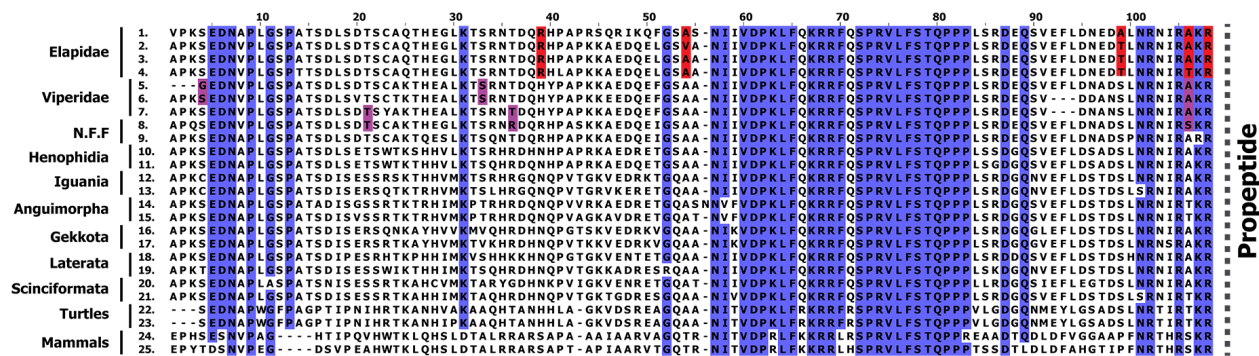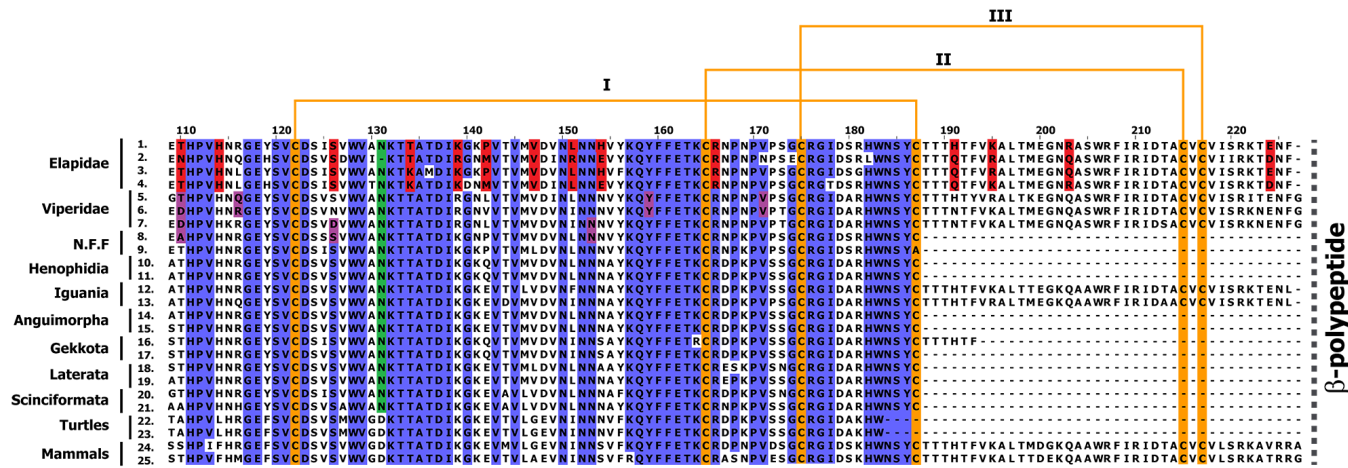

■ 90% > identity    
 ■ Glycosylation site    
 ■ Positively-selected (M8)    
 ■ Positively-selected (Integrative)    
  Structural stability
