# Supplementary material for: Molecular Evolution of Vertebrate Neurotrophins: Co-Option of the Highly Conserved Nerve Growth Factor Gene into the Advanced Snake Venom Arsenalf
Source: PubMed Central journal article supplement (PMC3843689; doi:10.1371/journal.pone.0081827), 2013-11-29

# S7. Evolutionary fingerprint of Brain-derived Neurotrophic Factors (BDNF)

## Brain-derived Neurotrophic Factor (BDNF)

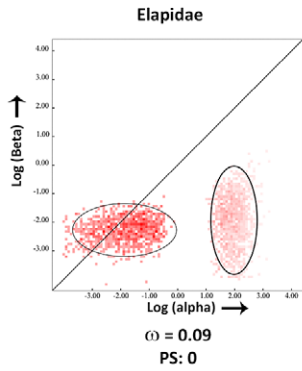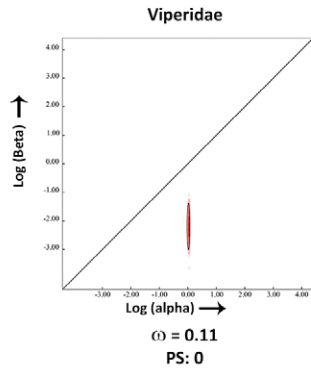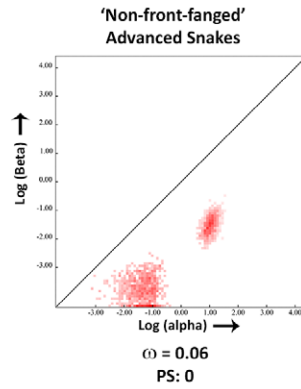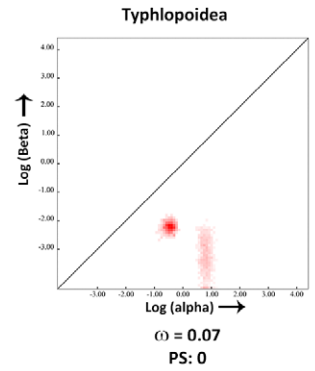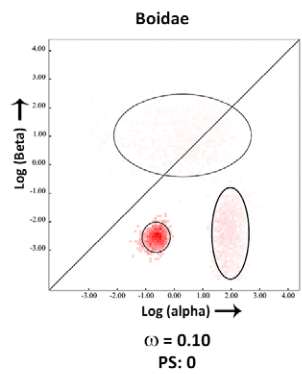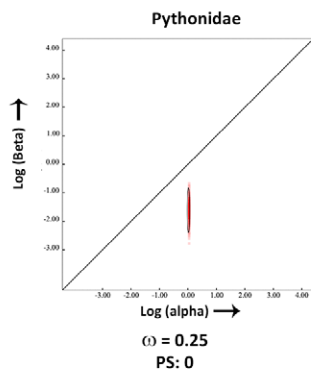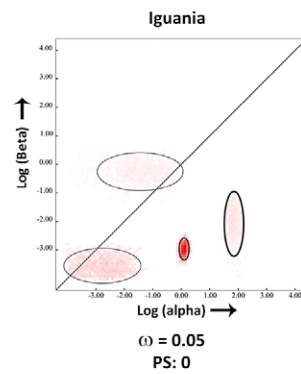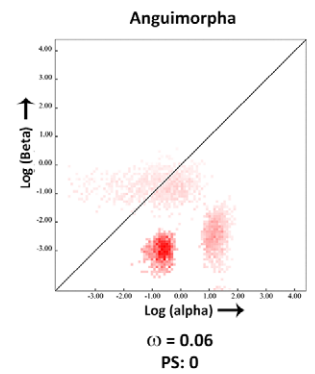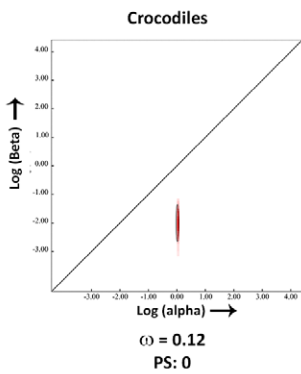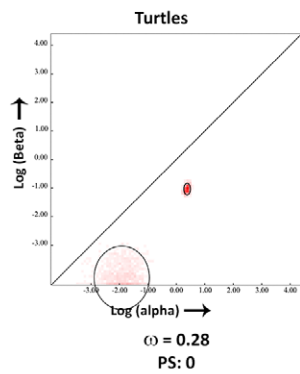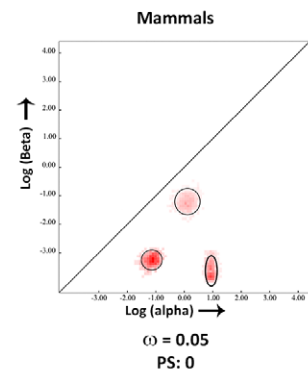

Supplement: pone.0081827.s012.pdf [file pone.0081827.s012.pdf]
