# Supplementary material for: Molecular Evolution of Vertebrate Neurotrophins: Co-Option of the Highly Conserved Nerve Growth Factor Gene into the Advanced Snake Venom Arsenalf
Source: PubMed Central journal article supplement (PMC3843689; doi:10.1371/journal.pone.0081827), 2013-11-29

# 9. Branch-site Random Effects Likelihood

## A. Elapidae nerve growth factors (NGF)

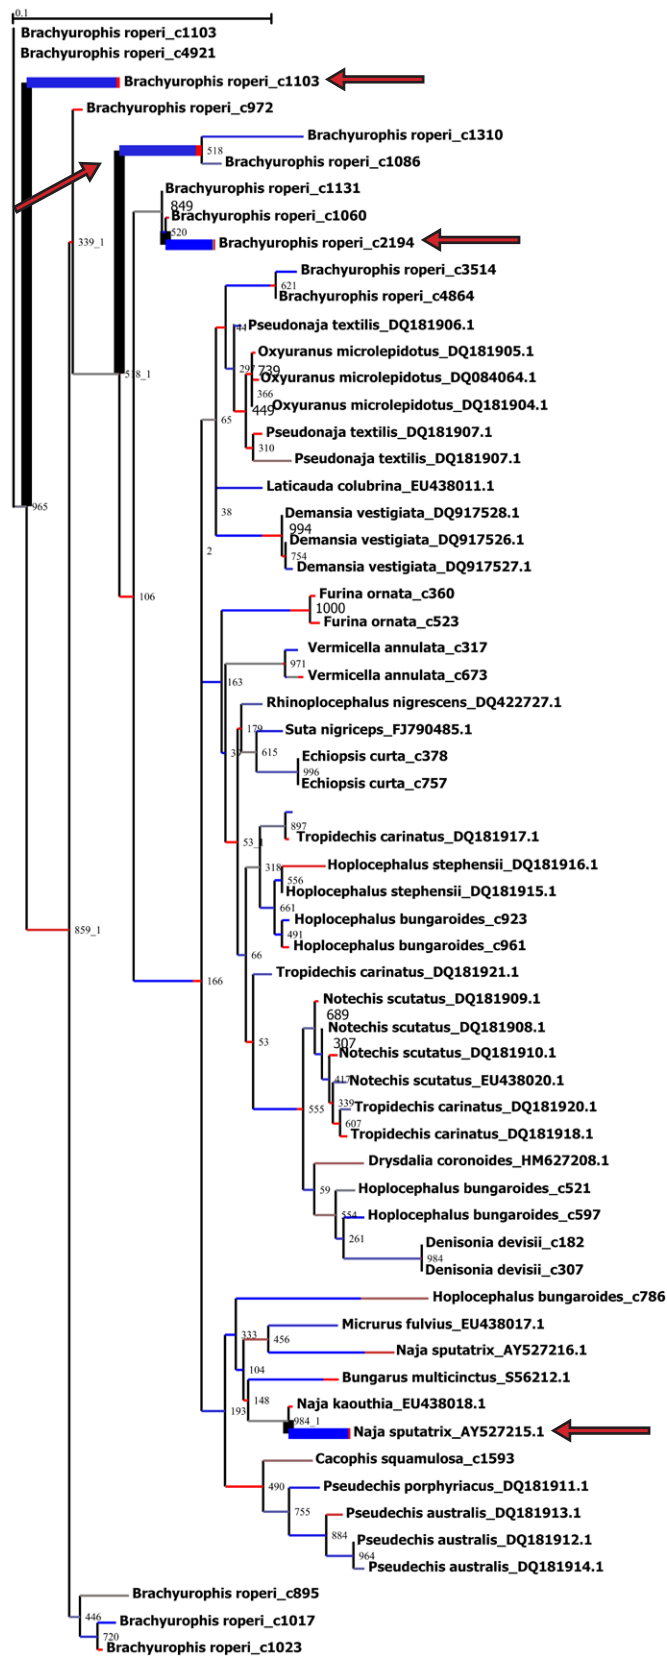

## B. Viperidae nerve growth factors (NGF)

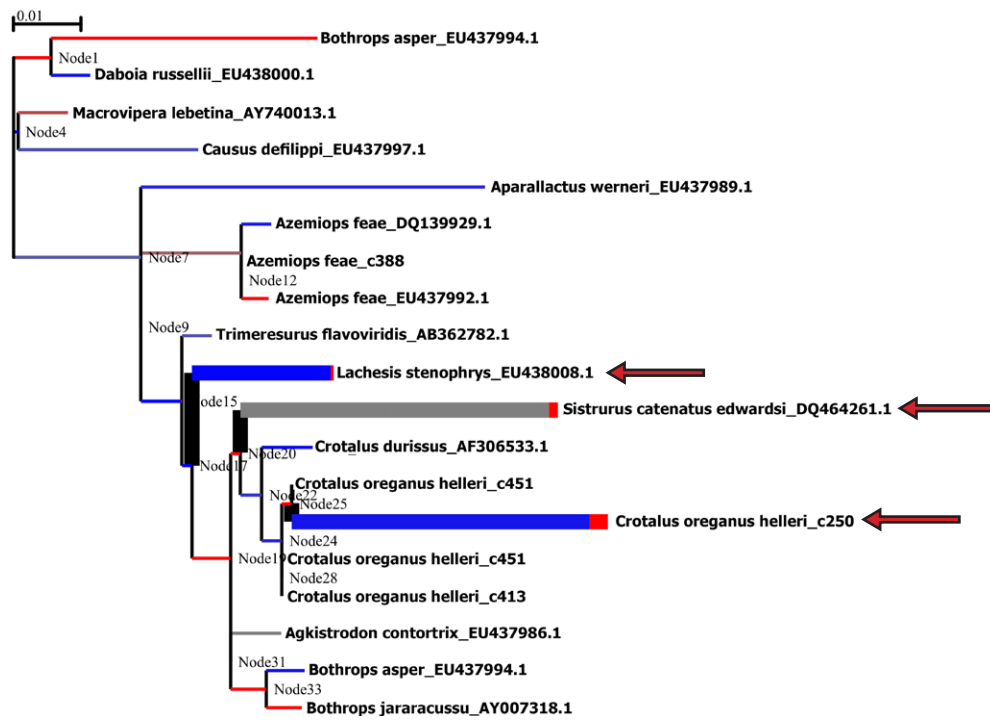

## C. 'Non-front-fanged' advanced snake nerve growth factors (NGF)

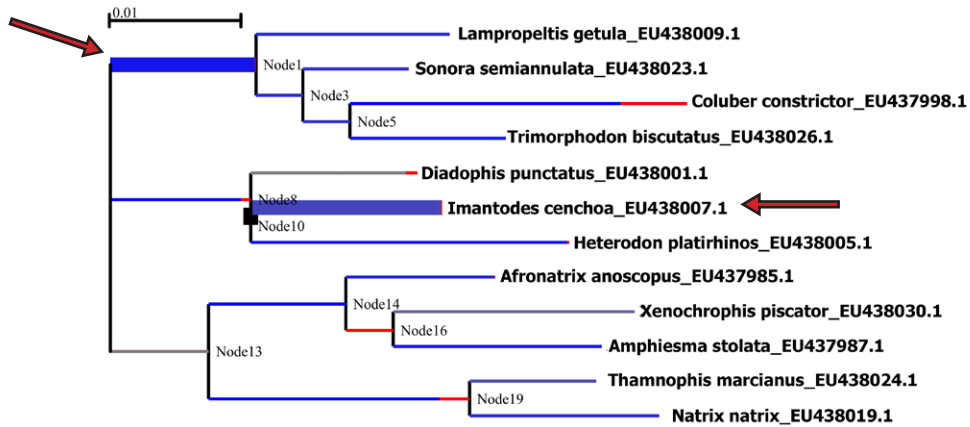

Supplement: pone.0081827.s014.pdf [file pone.0081827.s014.pdf]
